# Supplementary material for: Validity of AHRQ patient safety indicators derived from ICD-10 hospital discharge abstract data (chart review study)
Source: PubMed Central journal article supplement — BMJ Open. 2013 Oct 10;3(10):e003716. doi: 10.1136/bmjopen-2013-003716 (PMC3796280; doi:10.1136/bmjopen-2013-003716), 2013-10-10
Supplement: bmjopen-2013-003716.draft_revisions.pdf [file bmjopen-2013-003716.draft_revisions.pdf]

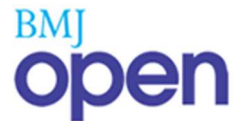

**Validity of AHRQ Patient Safety Indicators Derived from  
ICD-10 Hospital Discharge Abstract Data**

|                                 |                                                                                                                                                                                                                                                                                                                                                                                                                                                      |
|---------------------------------|------------------------------------------------------------------------------------------------------------------------------------------------------------------------------------------------------------------------------------------------------------------------------------------------------------------------------------------------------------------------------------------------------------------------------------------------------|
| Journal:                        | <i>BMJ Open</i>                                                                                                                                                                                                                                                                                                                                                                                                                                      |
| Manuscript ID:                  | bmjopen-2013-003716                                                                                                                                                                                                                                                                                                                                                                                                                                  |
| Article Type:                   | Research                                                                                                                                                                                                                                                                                                                                                                                                                                             |
| Date Submitted by the Author:   | 06-Aug-2013                                                                                                                                                                                                                                                                                                                                                                                                                                          |
| Complete List of Authors:       | Quan, Hude; University of Calgary, Community Health Sciences<br>Eastwood, Cathy; University of Calgary, Faculty of Nursing<br>Cunningham, Ceara; University of Calgary, Community Health Sciences<br>Liu, Mingfu; Alberta Health Services,<br>Flemons, Ward; University of Calgary, Medicine<br>De Coster, Carolyn; University of Calgary, Community Health Sciences;<br>Alberta Health Services,<br>Ghali, William; Univeristy of Calgary, Medicine |
| <b>Primary Subject Heading</b>: | Health services research                                                                                                                                                                                                                                                                                                                                                                                                                             |
| Secondary Subject Heading:      | Health informatics, Health services research, Epidemiology                                                                                                                                                                                                                                                                                                                                                                                           |
| Keywords:                       | Health & safety < HEALTH SERVICES ADMINISTRATION & MANAGEMENT,<br>Quality in health care < HEALTH SERVICES ADMINISTRATION &<br>MANAGEMENT, EPIDEMIOLOGY, Health policy < HEALTH SERVICES<br>ADMINISTRATION & MANAGEMENT                                                                                                                                                                                                                              |
|                                 |                                                                                                                                                                                                                                                                                                                                                                                                                                                      |

SCHOLARONE™  
Manuscripts

Only

1  
2  
3 **Title: Validity of AHRQ Patient Safety Indicators Derived from ICD-10 Hospital**  
4

5  
6 **Discharge Abstract Data**  
7

8 Running header: Validating Patient Safety Indicators in ICD-10 Data  
9

10  
11 Hude Quan MD PhD<sup>1</sup>, Cathy Eastwood, MN<sup>2</sup>, Ceara Cunningham MA<sup>1</sup>, Mingfu Liu<sup>3</sup> PhD, Ward

12  
13 Flemons MD<sup>4</sup>, Carolyn De Coster PhD<sup>1,3</sup>, William A Ghali MD MPH<sup>1,4</sup> for the IMECCHI

14  
15 investigators  
16  
17

18  
19 <sup>1</sup> Department of Community Health Sciences, University of Calgary, Canada  
20

21  
22 <sup>2</sup> Faculty of Nursing, University of Calgary, Canada  
23

24  
25 <sup>3</sup> Alberta Health Services, Alberta, Canada  
26

27  
28 <sup>4</sup> Department of Medicine, University of Calgary, Canada  
29  
30  
31

32 Correspondence:  
33

34 Hude Quan  
35

36 Department of Community Health Sciences  
37

38 University of Calgary  
39

40 320 Hospital Dr. NW, Calgary, Alberta, Canada, T2N 4Z6  
41

42 Telephone: (403) 210 8617  
43

44 E-mail: hquan@ucalgary.ca  
45  
46

47  
48 Word count: 2,533; Table: 3, Figure: 1, Appendix: 2 for on-line  
49  
50  
51  
52  
53  
54  
55  
56  
57  
58  
59  
60

## Abstract

Objective: To assess if AHRQ PSIs could be used for case-findings in International Classification of Disease (ICD)-10 hospital discharge abstract data.

Methods: We identified and randomly selected 490 patients with foreign body left during a procedure (PSI 5-foreign body), selected infections (IV site) due to medical care (PSI 7-infection), post-operative pulmonary embolism or deep vein thrombosis (PSI 12-PE/DVT), post-operative sepsis (PSI 13-sepsis), and accidental puncture or laceration (PSI 15-laceration) among patients discharged from three adult acute care hospitals in Calgary, Canada in 2007 and 2008. Their charts were reviewed for determining presence of PSIs and used as the reference standard, positive predictive value (PPV) statistics were calculated to determine the proportion of positives in the administrative data was 'true positives'.

## Results

The PPV for PSI 5-foreign body was 62.5% (95% confidence interval: 35.4% - 84.8%), PSI 7-infection was 79.1% (67.4% - 88.1%), PSI 12-PE/DVT was 89.5% (66.9% - 98.7), PSI 13-sepsis was 12.5% (1.6% - 38.4%) and PSI 15-laceration was 86.4% (75.0% - 94.0%) after excluding those who presented to the hospital with the condition.

## Conclusion

Several PSIs had high PPV in ICD administrative data and are thus powerful tools for true positive case-finding. The tools could be used to identify potential cases from large volume of admissions for verification through chart review. In contrast, their sensitivity has not been well-characterized and users of PSIs should be cautious if using these for 'quality of care reporting'

1  
2  
3  
4  
5  
6  
7  
8  
9  
10  
11  
12  
13  
14  
15  
16  
17  
18  
19  
20  
21  
22  
23  
24  
25  
26  
27  
28  
29  
30  
31  
32  
33  
34  
35  
36  
37  
38  
39  
40  
41  
42  
43  
44  
45  
46  
47  
48  
49  
50  
51  
52  
53  
54  
55  
56  
57  
58  
59  
60

presenting rate of PSIs because under-coded data would generate falsely low PSI rates.

Key words: ICD-10, patient safety, outcome, administrative data

For peer review only

## Introduction

Patient safety is a critical component of health care quality. Assessments of patient safety are traditionally done through chart review, survey and voluntary reporting of adverse events and medical errors(1;2). These data collection methods focus on a specific type of event, collect data from non-random and biased populations, cover limited geographic areas, or are too labor-intensive for widespread use. Therefore, researchers have paid great attention to routinely collected hospital discharge abstract administrative data for population-based studies of adverse events(3). Therefore, the Agency for Healthcare Research and Quality (AHRQ) conducted pioneering work to develop patient safety indicators (PSIs) for use with the International Classification of Disease, 9<sup>th</sup> version, Clinical Modification (ICD-9-CM) administrative data, which cover large geographic areas and are readily available and relatively inexpensive to use.

AHRQ PSIs were developed through a literature search, review of ICD-9-CM manuals, consultation with physician panels, and empirical data analyses. Over 200 ICD-9-CM codes representing potential patient safety problems were identified and 48 indicators were labeled as the most promising PSIs by the AHRQ research team. Of these, 20 hospital-level and 7 area-level PSIs were recommended by one or more multi-specialty panels as a set of ‘accepted’ indicators.(4) To facilitate utilization of PSIs, AHRQ developed and distributed (at no cost) SAS and SPSS software tools. The PSIs can be used to help hospitals identify potential adverse events that might need further study and also provide an opportunity to assess the occurrence of adverse events and in-hospital complications using routinely collected administrative data.

The AHRQ PSIs have been broadly used to assess the occurrence of adverse events and in-hospital complications by many international and national agencies, including Organization for Economic Cooperation and Development. Drosler et al.(5;6) analyzed hospital discharge abstract

1  
2  
3 administrative data from multiple countries and found that PSI rates varied across countries. The  
4  
5 variation in the PSI estimate could be caused by true quality of care differences or by differences  
6  
7 in data quality.  
8  
9

10  
11 PSIs could be used for case-finding or/and quality of care reporting. When PSIs are used for  
12  
13 case-finding and positive predictive value (PPV) is low, chart review or investigation is required  
14  
15 to verify the true case status after identification of cases from the administrative data. When  
16  
17 PSIs are used to generate 'quality of care report' presenting rates, all of these four statistical  
18  
19 parameters of validity (i.e. sensitivity, specificity, negative predictive value and PPV) should be  
20  
21 high.  
22  
23

24  
25 PSIs have been validated using chart data as 'gold standard' or 'reference' in the USA  
26  
27 ICD-9-CM data only (see Appendix 1). Many countries have employed ICD-10 for coding  
28  
29 hospital discharge abstract data.(7) However, the validity of PSIs in ICD-10 data has not been  
30  
31 studied. Therefore, we conducted this study to estimate PPV or 'true positives' of PSIs derived  
32  
33 from Canadian ICD-10 hospital discharge abstract data with flag of presence on admission using  
34  
35 chart review as a reference standard.  
36  
37  
38  
39  
40

## 41 **Methods**

### 42 *43 Identify patients at risk for each of 5 PSIs from ICD-10 data*

44  
45  
46 Of the AHRQ PSIs, we assessed PPV for 5 PSIs, which are likely to have high PPVs  
47  
48 based on literature, including foreign body left during procedure (PSI 5 - foreign body), selected  
49  
50 infections (IV site) due to medical care (PSI 7 - infection), postoperative pulmonary embolism or  
51  
52 deep vein thrombosis (PSI 12 - PE/DVT), postoperative sepsis (PSI 13 -sepsis), and accidental  
53  
54 puncture or laceration (PSI 15 - laceration).  
55  
56  
57  
58  
59  
60

1  
2  
3 Our study sample was patients discharged in the years 2007 and 2008 from all three adult  
4 acute care hospitals in Calgary, Canada, a city with a population of just over one million.  
5  
6 Professionally trained health records coders in Calgary code up to 50 diagnosis codes and 20  
7  
8 procedures for each patient using ICD-10-CA/CCI (Canadian ICD-10 and Canadian  
9  
10 Classification of Intervention)(8). One coordinator supervises and manages the coding practice at  
11  
12 the three sites to establish a consistent approach to coding.  
13  
14

15  
16 We developed ICD-10 PSI algorithm(9) based on AHRQ ICD-9-CM PSI definition  
17  
18 manual as the blueprint (see ICD-10 codes in Appendix 2). PSIs in the data were defined using  
19  
20 the ICD-10 codes in the 49 secondary diagnosis coding fields. We included patients with those  
21  
22 ICD-10 codes. Earliest admission date was assigned to patients as the index date for those with  
23  
24 multiple admissions in the study period. The indexed patients were stratified by the three  
25  
26 hospitals and 50 patients were randomly selected per hospital for each PSI when there were more  
27  
28 than 50 patients available. We aimed to review 40 patients at each hospital for each PSI, since at  
29  
30 least 30 patients should be reviewed for calculating PPV.(10) Because PSI 5, foreign body left in  
31  
32 during procedure, occurs rarely, we expanded the observation period for this PSI to 2006-2009 to  
33  
34 increase the number of patients. However we did not reach the target sample size for PSI 5 and 7.  
35  
36 An operating room procedure was defined using the code for inpatient procedure room type: '1'  
37  
38 for main operating room, '8' for cardiac catheterization laboratory or '9' for ambulatory care  
39  
40 operating room. Patients who underwent surgeries in the same day or emergency room were not  
41  
42 included.  
43  
44  
45  
46  
47  
48

#### 49 ***Review charts to determine presence and absence of PSIs***

50  
51 Corresponding patient charts for the sampled patients were located using a combination  
52  
53 of the patient chart number and personal health number, which uniquely identifies each patient  
54  
55  
56

1  
2  
3 and admission. Two chart reviewers underwent training and practice in the data extraction  
4  
5 process using the PSI data collection tools developed by AHRQ(11). In the training session, the  
6  
7 definition of study variables was discussed. Then the reviewers extracted data independently for  
8  
9 evidence of PSIs through an examination of the entire chart, including the cover page, discharge  
10  
11 summaries, pathology reports (including autopsy reports), trauma and resuscitation records,  
12  
13 admission notes, consultation reports, surgery/operative reports, anesthesia reports,  
14  
15 interdisciplinary progress notes, and physician daily progress notes. The reviewers followed the  
16  
17 AHRQ definitions to determine the presence or absence of the five PSIs, and specified whether  
18  
19 these events were present at the time of admission or arose during hospitalization. In the period  
20  
21 of data collection, they discussed cases with uncertainty in determining conditions to ensure the  
22  
23 consistency between them.  
24  
25  
26  
27  
28  
29  
30

### 31 *Statistical analysis*

32  
33 The ICD-10 administrative data and chart review data were linked and the linked data  
34  
35 were analyzed using statistical software of SAS 9.2. Study populations were characterized using  
36  
37 descriptive statistics. As mentioned above, we calculated PPV and its 95% confidence interval  
38  
39 for each PSI recorded in ICD-10 hospital discharge data accepting the chart review data as a  
40  
41 ‘reference standard’. PPV determines the extent to which a PSI present in the ICD-10 data was  
42  
43 also present in the chart review data. Unit of analysis is patient because one discharge abstract  
44  
45 record and chart was assigned to each patient.  
46  
47  
48  
49  
50  
51

### 52 **Results**



1  
2  
3 A total of 490 patients were included from ICD-10 hospital discharge abstract data. There  
4  
5 were 334 patients after excluding non-surgical patients for PSI 12 - EP/DVT and PSI 13 - sepsis  
6  
7 (see Figure 1) and 163 patients after excluding those with PSIs present on admission. We  
8  
9 reviewed all charts of 490 patients.  
10  
11

12  
13 Among 334 patients, the mean age ranged from 57.9 to 67.2 years across the 5 PSIs (see  
14  
15 Table 1). The proportion of male patients was lowest for PSI 13 - sepsis (36.6%) and highest for  
16  
17 PSI 7 -infection (55.3%). Patients with PSI 7-infection, 12-PE/DVT, or 13-sepsis stayed in  
18  
19 hospital 32.7, 41.3 and 43.9 days on average.  
20  
21

22  
23 Some countries do not code whether the condition was present at admission or arose  
24  
25 during the hospital stay. When conditions present on admission were included (see Table 2), the  
26  
27 PPV was 35.6% for PSI 5-foreign body, 70.6% for PSI 7-infection, 79.0% for PSI 12-PE/DVT,  
28  
29 9.8% for PSI 13-sepsis and 90.8% for PSI 15-laceration. When conditions present on admission  
30  
31 were excluded from the analysis, the PPV increased for PSI 5-foreign body (62.5%), 7-infection  
32  
33 (79.1%), 12-PE/DVT (89.5%) and 13-sepsis (12.5%) but decreased for PSI 15-laceration (from  
34  
35 90.8% to 86.4%).  
36  
37  
38  
39

40  
41 Considering some countries may not code procedures in administrative data, we  
42  
43 evaluated the PPV among 123 PSI 12-PE/DVT patients and 117 PSI 13-sepsis patients ignoring  
44  
45 surgical status. The PPV was 25.2% for PSI 12-PE/DVT, and 27.4% for PSI 13-sepsis. When  
46  
47 present on admission was considered, the PPV increased to 27.0% for PSI 12-PE/DVT, and  
48  
49 47.1% for PSI 13-sepsis.  
50  
51  
52  
53  
54  
55  
56  
57  
58  
59  
60

1  
2  
3 The reasons for misclassification of PSI conditions in administrative data varied across  
4 PSIs (see Table 3). The most common reason was that the condition was present on admission.  
5  
6  
7

## 8 9 **Discussion**

10 Like previous PSI validation studies in ICD-9-CM data, we focused on the PPV in ICD-  
11 10 administrative data as the foremost of interest. Our study revealed that PSI PPVs in most  
12 instances are sufficiently high to support widespread use for case findings. The low PPVs for  
13 some PSIs, such as sepsis do not support utility of the PSIs for quality of care reporting for  
14 comparisons across jurisdictions.  
15  
16  
17  
18  
19  
20  
21  
22  
23

24 The validity of ICD-10 data varied by PSI. PSI 5-foreign body and 13-sepsis had low  
25 PPV but PSI 7-infection, 12-PE/DVT and 15-laceration had high PPV. The high PPV for PSI 12-  
26 PE/DVT (89.5%) is supported by one US study(12) (PPV=79%), but is higher than four other  
27 US studies (PPV=22-55%).(13-16) In contrast to our finding for PSI 13-sepsis (PPV=9.8%),  
28 Romano et al.(15) reported a higher PPV for PSI 13-sepsis (45%). As our finding PPV for PSI  
29 15-laceration (PPV=90.8%), Kaafarani et al.(16) and Utter(17) et al. reported high PPV for PSI  
30 15-laceration (91% and 85%, respectively).  
31  
32  
33  
34  
35  
36  
37  
38  
39

40 Because low prevalence PSIs with reasonable precision (i.e. 95% confidence intervals)  
41 requires reviewing many charts for calculating sensitivity, all previous studies except for the  
42 study conducted by Koch et al.(18) evaluated data quality using PPV. The PPV value depends on  
43 prevalence and varies greatly across PSIs and studies. For example, the PPV for PSI 12-PE/DVT  
44 ranged from 22% to 79% across studies conducted in USA.(12-16) Koch et al.(18) compared  
45 agreement between ICD-9-CM data, National Surgical Quality Improvement Program (NSQIP)  
46 and Cardiovascular Information Registry (CVIR) in PSIs. The agreement was substantial for PSI  
47  
48  
49  
50  
51  
52  
53  
54  
55  
56

1  
2  
3 12-PE/DVT and poor for PSI 9-hemorrhage, PSI 11-respiratory failure and PSI 13-sepsis.  
4  
5 Sensitivity was very low, for example 0.13% for PSI 9-hemorrhage, 1.35% for PSI 11-  
6  
7 respiratory failure, 1.6% for PSI 12-PE/DVT and 0.13% for PSI 13-sepsis when ICD-9-CM and  
8  
9 NSQIP were compared.  
10  
11

12  
13 Variation in validity across PSIs is determined by factors related to physicians (i.e., chart  
14  
15 documentation), and coders (i.e., coding guidelines and coders' practice). Coders code medical  
16  
17 events after discharge based on chart documentation. We used chart review as our reference  
18  
19 standard; therefore, completeness of chart documentation could not be evaluated. Physicians  
20  
21 might not document consequences of medical care in charts, leading to under-coding in hospital  
22  
23 discharge abstracts. In addition, coders at hospitals are allotted a specific amount of time per  
24  
25 chart on average, for example, 30 minutes in Alberta. Thus they might focus on coding diagnoses  
26  
27 and procedures that contribute significantly to length of stay such as PE/DVT, and ignore minor  
28  
29 conditions such as infection or laboratory results that indicate sepsis, to follow Canada national  
30  
31 coding guidelines. Our reviewers focused on determining the presence or absence of conditions  
32  
33 based on all documented information in the chart, including diagnostic imaging and laboratory  
34  
35 results. This is in contrast to general coding guidelines(8) that instruct coders to confine their  
36  
37 coding to clinical problems, conditions, or circumstances that are identified in the record by the  
38  
39 treating physicians as the clinically significant reason for the patient's admission, or that require  
40  
41 or influence evaluation, treatment, management, or care. Coders do not typically code problems  
42  
43 that do not meet these requirements, whereas the reviewers who conducted our 'reference  
44  
45 standard' chart review included them regardless of the significance of the condition on resource  
46  
47 use during hospitalization. Coders are instructed that when a condition is suggested by diagnostic  
48  
49 test results, they should only code the condition if it has been confirmed by physician  
50  
51  
52  
53  
54  
55  
56  
57  
58  
59  
60

1  
2  
3 documentation. Our previous studies demonstrated that hospital discharge abstract data quality is  
4 not related to coders' employment status (full-time/part time and length of employment) but  
5 related to physician documentation quality.(19;20)  
6  
7  
8  
9

10  
11 Excluding conditions present on admission improves PSI validity. For example, the PPV  
12 for PSI 12-PE/DVT increased from 79.0% to 89.5% from including to excluding the presence of  
13 the condition on admission. Canada has a long history of flagging timing of condition occurrence.  
14 Some US and Australian states currently have similar data elements in their discharge abstract  
15 data, and the US has recently begun coding the timing of conditions nation-wide. Timing of  
16 condition occurrence is not aimed at judging causal relationships between medical care and  
17 complications, just flagging whether the condition occurred or was diagnosed during the  
18 hospitalization. To capture complications, Japan has specified fields for coding complications in  
19 its hospital discharge data, in addition to diagnoses and procedures.  
20  
21  
22  
23  
24  
25  
26  
27  
28  
29  
30  
31

32  
33 Could AHRQ PSIs derived from hospital discharge abstract data be utilized for  
34 comparing quality of care across countries and/or jurisdictions, or for monitoring system  
35 performance in an institution? Because data quality contributes to the magnitude of PSIs , data  
36 validity has to be similar across comparison groups (such as countries, regions or jurisdictions)  
37 and over time. Thus, PSIs should not be compared across jurisdictions without validation  
38 because adjustment for data validity is necessary. Our findings suggest that PSIs could be used to  
39 screen potential cases with adverse events using administration data. Confirming the presence of  
40 these events needs additional clinical information such as chart reviews. If PSIs are used for  
41 comparison, validity of data has to be adjusted/considered in the analysis.  
42  
43  
44  
45  
46  
47  
48  
49  
50  
51  
52  
53  
54  
55  
56  
57  
58  
59  
60

1  
2  
3 While PSIs are used for monitoring quality of care improvement over time, the  
4  
5 assumption of temporal consistency of data validity has to be met. Unfortunately, we did not  
6  
7 evaluate PSI validity over time. Quan et al.(21) evaluated impact of ICD-10 implementation on  
8  
9 data quality through chart review of 32 conditions. Canadian ICD-10 data had significantly  
10  
11 higher sensitivity for one condition and lower sensitivity for seven conditions relative to ICD-9-  
12  
13 CM data. The two databases had similar sensitivity values for the remaining 24 conditions.  
14  
15 Walker(22) et al. compared coding practice between ICD-9-CM and ICD-10 and reported that  
16  
17 the number of diagnoses coded decreased in four Canadian provinces and remained similar in  
18  
19 other five provinces after implementation of ICD-10. Januel JM(23) et al. reported that of 36  
20  
21 conditions assessed in Switzerland, Kappa values for ICD-10 and chart data increased for 29  
22  
23 conditions and decreased for seven conditions compared with ICD-9-CM and chart data.  
24  
25  
26  
27  
28

29 Our study has limitations. First, of 20 AHRQ PSIs, we intentionally evaluated five  
30  
31 conditions that might have a high validity based on literature. Second, we used chart data as the  
32  
33 reference standard; conditions not documented in chart were missing. Prospective data collection  
34  
35 through clinical examination on these events should be conducted to establish near gold standard.  
36  
37 Third, this study was conducted in one urban area; the validity of PSIs might vary by institutions  
38  
39 or regions.  
40  
41  
42  
43

44 In conclusion, our study supports that PSIs could be used for case-findings in the ICD-10  
45  
46 hospital discharge abstract data. Even PSIs with low PPVs could be used to identify potential  
47  
48 cases from large volume of admissions for verification through chart review. In contrast, their  
49  
50 sensitivity has not been well-characterized because of the inherit challenges of reviewing huge  
51  
52 numbers of charts for properly testing sensitivity. Therefore, users of PSIs should be cautious if  
53  
54  
55  
56  
57  
58  
59  
60

1  
2  
3  
4  
5  
6  
7  
8  
9  
10  
11  
12  
13  
14  
15  
16  
17  
18  
19  
20  
21  
22  
23  
24  
25  
26  
27  
28  
29  
30  
31  
32  
33  
34  
35  
36  
37  
38  
39  
40  
41  
42  
43  
44  
45  
46  
47  
48  
49  
50  
51  
52  
53  
54  
55  
56  
57  
58  
59  
60

using these for 'quality of care reporting' presenting rate of PSIs because under-coded data would generate falsely low PSI rates.

For peer review only

## Acknowledgement

Dr Quan and Ghali are supported by Alberta Innovates- Health Solutions salary awards. Dr Ghali is supported by Government of Canada Chairs. IMECCHI investigators are listed at [www.IMECCHI.org](http://www.IMECCHI.org)

## Funding Statement

This work was supported by Canadian Institutes of Health Research grant number 172490.

## Competing Interests Statement:

None

## Contributorship Statement:

Hude Quan: Conception and design, acquisition of data, analysis, interpretation of data, and final approval of the version to be published.

Cathy Eastwood: Acquisition of data, interpretation of data, critical revision and final approval of the version to be published.

Ceara Cunningham: Acquisition of data, interpretation of data, critical revision and final approval of the version to be published.

Mingfu Liu: Acquisition of data, analysis, interpretation of data, critical revision and final approval of the version to be published.

1  
2  
3 Ward Flemons: Conception and design, interpretation of data, critical revision and final approval  
4  
5 of the version to be published.  
6  
7

8  
9 Carolyn De Coster: Conception and design, interpretation of data, critical revision and final  
10  
11 approval of the version to be published.  
12  
13

14  
15 William A Ghali: Conception and design, interpretation of data, critical revision and final  
16  
17 approval of the version to be published.  
18  
19



1  
2  
3  
4  
5  
6  
7  
8  
9  
10  
11  
12  
13  
14  
15  
16  
17  
18  
19  
20  
21  
22  
23  
24  
25  
26  
27  
28  
29  
30  
31  
32  
33  
34  
35  
36  
37  
38  
39  
40  
41  
42  
43  
44  
45  
46  
47  
48  
49  
50  
51  
52  
53  
54  
55  
56  
57  
58  
59  
60

For peer review only

## References

- 1  
2  
3  
4  
5  
6  
7  
8 (1) Baker GR, Norton PG. Adverse events and patient safety in Canadian health care. *CMAJ* 2004 Feb 3;170(3):353-4.
- 9  
10  
11 (2) Zhan C, Kelley E, Yang HP et al. Assessing patient safety in the United States:  
12 challenges and opportunities. *Med Care* 2005 Mar;43(3 Suppl):42-7.
- 13  
14 (3) Zhan C, Miller MR. Administrative data based patient safety research: a critical review.  
15 *Qual Saf Health Care* 2003 Dec;12 Suppl 2:58-63.
- 16  
17 (4) Agency for Healthcare Research and Quality. Patient Safety Indicators: Technical  
18 Specifications (version 4.2). <http://www.qualityindicators.ahrq.gov>
- 19  
20 (5) Drosler SE, Klazinga NS, Romano PS et al. Application of patient safety indicators  
21 internationally: a pilot study among seven countries. *Int J Qual Health Care* 2009  
22 Aug;21(4):272-8.
- 23  
24 (6) Drosler SE, Romano PS, Tancredi DJ, Klazinga NS. International comparability of  
25 patient safety indicators in 15 OECD member countries: a methodological approach of  
26 adjustment by secondary diagnoses. *Health Serv Res* 2012 Feb;47(1 Pt 1):275-92.
- 27  
28 (7) Jette N, Quan H, Hemmelgarn B et al. The Development, evolution, and modifications of  
29 ICD-10: Challenges to the international comparability of morbidity data. *Med Care* 2010  
30 Dec;48(12):1105-10.
- 31  
32 (8) Canadian Institute for Health Information. Canadian Coding Standards for ICD-10-CA  
33 and CCI. [http://secure.cihi.ca/cihiweb/dispPage.jsp?cw\\_page=RC\\_382\\_E](http://secure.cihi.ca/cihiweb/dispPage.jsp?cw_page=RC_382_E)
- 34  
35 (9) Quan H, Drösler S, Sundararajan V et al. Adaptation of AHRQ Patient Safety Indicators  
36 for Use in ICD-10 Administrative Data by an International Consortium. *Advances in*  
37 *Patient Safety: New Directions and Alternative Approaches* 2013 Jan 3.
- 38  
39 (10) Zhou X, Obuchowski N, McClish D. *Statistical methods in diagnostic medicine*. 2 ed.  
40 New Jersey: John Wiley & Sons; 2011.
- 41  
42 (11) AHRQ. AHRQ quality indicators validation pilot.  
43 <http://qualityindicators.ahrq.gov/validationpilot.htm>
- 44  
45 (12) White RH, Sadeghi B, Tancredi DJ et al. How valid is the ICD-9-CM based AHRQ  
46 patient safety indicator for postoperative venous thromboembolism? *Med Care* 2009  
47 Dec;47(12):1237-43.
- 48  
49  
50  
51  
52  
53  
54  
55  
56  
57  
58  
59  
60

- 1  
2  
3  
4  
5  
6  
7  
8  
9  
10  
11  
12  
13  
14  
15  
16  
17  
18  
19  
20  
21  
22  
23  
24  
25  
26  
27  
28  
29  
30  
31  
32  
33  
34  
35  
36  
37  
38  
39  
40  
41  
42  
43  
44  
45  
46  
47  
48  
49  
50  
51  
52  
53  
54  
55  
56  
57  
58  
59  
60
- (13) Henderson KE, Recktenwald A, Reichley RM et al. Clinical validation of the AHRQ postoperative venous thromboembolism patient safety indicator. *Jt Comm J Qual Patient Saf* 2009 Jul;35(7):370-6.
  - (14) Zhan C, Battles J, Chiang YP, Hunt D. The validity of ICD-9-CM codes in identifying postoperative deep vein thrombosis and pulmonary embolism. *Jt Comm J Qual Patient Saf* 2007 Jun;33(6):326-31.
  - (15) Romano PS, Mull HJ, Rivard PE et al. Validity of selected AHRQ patient safety indicators based on VA National Surgical Quality Improvement Program data. *Health Serv Res* 2009 Feb;44(1):182-204.
  - (16) Kaafarani HM, Borzecki AM, Itani KM et al. Validity of selected patient safety indicators: opportunities and concerns. *J Am Coll Surg* 2011 Jun;212(6):924-34.
  - (17) Utter GH, Zrelak PA, Baron R et al. Positive predictive value of the AHRQ accidental puncture or laceration patient safety indicator. *Ann Surg* 2009 Dec;250(6):1041-5.
  - (18) Koch CG, Li L, Hixson E, Tang A, Phillips S, Henderson JM. What are the real rates of postoperative complications: elucidating inconsistencies between administrative and clinical data sources. *J Am Coll Surg* 2012 May;214(5):798-805.
  - (19) Hennessy DA, Quan H, Faris P, Beck CA. Do coder characteristics influence validity of ICD-10 hospital discharge data? *BMC Health Serv Res* 2010;10:99.
  - (20) So L, Beck CA, Brien S et al. Chart documentation quality and its relationship to the validity of administrative data discharge records. *Health Informatics J* 2010;16(2):101-13.
  - (21) Quan H, Li B, Saunders LD et al. Assessing validity of ICD-9-CM and ICD-10 administrative data in recording clinical conditions in a unique dually coded database. *Health Serv Res* 2008 Aug;43(4):1424-41.
  - (22) Walker RL, Hennessy DA, Johansen H, Sambell C, Lix L, Quan H. Implementation of ICD-10 in Canada: how has it impacted coded hospital discharge data? *BMC Health Serv Res* 2012;12:149.
  - (23) Januel JM, Luthi JC, Quan H et al. Improved accuracy of co-morbidity coding over time after the introduction of ICD-10 administrative data. *BMC Health Serv Res* 2011;11:194.

Table 1. Characteristics of patients by AHRQ patient safety indicator (PSI)

|                     | PSI 5<br>Foreign body<br>left during<br>procedure<br><br>N= 45 | PSI 7<br>Selected<br>infections<br>due to<br>medical care<br><br>N=85 | PSI12<br>Postoperative<br>pulmonary<br>embolism or<br>deep vein<br>thrombosis<br>N=43 surgery<br>patients | PSI13<br>Postoperative<br>sepsis<br><br>N=41 surgery<br>patients | PSI15<br>Accidental<br>puncture or<br>laceration<br><br>N=120 |
|---------------------|----------------------------------------------------------------|-----------------------------------------------------------------------|-----------------------------------------------------------------------------------------------------------|------------------------------------------------------------------|---------------------------------------------------------------|
| Age Mean<br>(Range) | 58.0<br>(21.6 – 93.5)                                          | 61.7<br>(18.5 – 90.0)                                                 | 67.2<br>(31.0 – 94.0)                                                                                     | 63.9<br>(19.9 – 83.5)                                            | 57.9<br>(19.3 – 96.5)                                         |
| Sex (male)          | 24<br>(53.3%)                                                  | 47<br>(55.3%)                                                         | 23<br>(53.5%)                                                                                             | 15<br>(36.6%)                                                    | 44<br>(36.7%)                                                 |
| Length of<br>stay   | 14.7<br>(1 – 195)                                              | 32.7<br>(2 – 184.0)                                                   | 41.3<br>(2 - 274)                                                                                         | 43.9<br>(1 – 238)                                                | 16.2<br>(1. – 181)                                            |

Table 2. Positive predictive value and 95% confidence interval (95% CI) for AHRQ patient safety indicators (PSI) recorded in ICD-10 hospital discharge abstract administrative data comparing chart data

| Patient Safety Indicator                                                                | Including PSIs present on admission<br>% (n/N, 95% CI) | Excluding PSIs present on admission<br>% (n/N, 95% CI) |
|-----------------------------------------------------------------------------------------|--------------------------------------------------------|--------------------------------------------------------|
| PSI 5 Foreign body left during procedure                                                | 35.6% (16/45)<br>(21.9% - 51.2%)                       | 62.5% (10/16)<br>(35.4% - 84.8%)                       |
| PSI 7 Selected infections due to medical care                                           | 70.6% (60/85)<br>(59.7% - 80.0%)                       | 79.1% (53/67)<br>(67.4% - 88.1%)                       |
| PSI12 Postoperative pulmonary embolism or deep vein thrombosis among surgery patients   | 79.0% (34/43)<br>(64.0% - 90.0%)                       | 89.5% (17/19)<br>(66.9% - 98.7)                        |
| PSI13 Postoperative sepsis among surgery patients                                       | 9.8% (4/41)<br>(2.7% - 23.1%)                          | 12.5% (2/16)<br>(1.6% - 38.4%)                         |
| PSI15 Accidental puncture or laceration                                                 | 90.8% (109/120)<br>(84.2% - 95.3%)                     | 86.4% (51/59)<br>(75.0% - 94.0%)                       |
| When surgical status was ignored                                                        |                                                        |                                                        |
| PSI12 Pulmonary embolism or deep vein thrombosis among surgery and non-surgery patients | 25.2% (31/123)<br>(17.8% - 33.8%)                      | 27.0% (10/37)<br>(13.8% - 44.1%)                       |
| PSI13 Postoperative sepsis among surgery or non-surgery patients                        | 27.4% (32/117)<br>(19.5% - 36.4%)                      | 47.1% (16/34)<br>(29.8% - 64.9%)                       |

Table 3. Reasons for false positives of AHRQ patient safety indicators (PSI) in ICD-10 hospital discharge abstract administrative data when the indicator of presence on admission was ignored.

| PSI 5                                             | PSI 7                                        | PSI 12                                                   | PSI 13                               | PSI 15                                  |
|---------------------------------------------------|----------------------------------------------|----------------------------------------------------------|--------------------------------------|-----------------------------------------|
| Foreign body left during procedure                | Selected infections due to medical care      | Postoperative pulmonary embolism or deep vein thrombosis | Post operative sepsis                | Accidental puncture or laceration       |
| N=29                                              | N=25                                         | N=9                                                      | N=37                                 | N=11                                    |
| 18- present on admission                          | 7- present on admission                      | 6- present on admission                                  | 15- present on admission             | 4 – present on admission                |
| 8– no foreign body                                | 11 – unrelated to medical care               | 2 – had DVT/PE in past                                   | 12 – urgent surgeries, having sepsis | 7 –no accidental puncture or laceration |
| 2 – for treatment purposes (e.g. packing, stitch) | 5 – IV site bruised or injured, no infection | 1 – no DVT/PE                                            | 6 – urgent surgeries, no sepsis      |                                         |
| 1 – patient pulled and broke catheter             | 2 – conflicting documentation                |                                                          | 2 – no sepsis                        |                                         |
|                                                   |                                              |                                                          | 2 – no surgery, sepsis               |                                         |

1  
2  
3  
4  
5  
6  
7  
8  
9  
10  
11  
12  
13  
14  
15  
16  
17  
18  
19  
20  
21  
22  
23  
24  
25  
26  
27  
28  
29  
30  
31  
32  
33  
34  
35  
36  
37  
38  
39  
40  
41  
42  
43  
44  
45  
46  
47  
48  
49  
50  
51  
52  
53  
54  
55  
56  
57  
58  
59  
60

For peer review only

## ARTICLE SUMMARY

### 1) Article focus

- The Agency for Healthcare Research and Quality (AHRQ) patient safety indicators (PSIs) have been broadly used to assess the occurrence of adverse events and in-hospital complications using routinely collected administrative data.

- Estimates of PSIs could be caused by true quality of care differences or by differences in data quality.

- This study estimated 'true positives' of PSIs derived from Canadian ICD-10 hospital discharge abstract data with flag of presence on admission using chart review as a reference standard.

### 2) Key messages

- The validity of ICD-10 data varied by PSI.

- PSIs could be used to screen potential cases with adverse events using administration data.

Confirming the presence of these events needs additional clinical information.

- If PSIs are used for comparison of jurisdiction performance, validity of data has to be adjusted for and considered in the analysis.

### 3) Strengths and Limitations

- To our knowledge, this is the first validation of ICD-10 data in recording AHR PSIs.

- We validated 5 out of 20 PSIs.

- Chart data were used as the reference standard; conditions not documented in chart were missing.



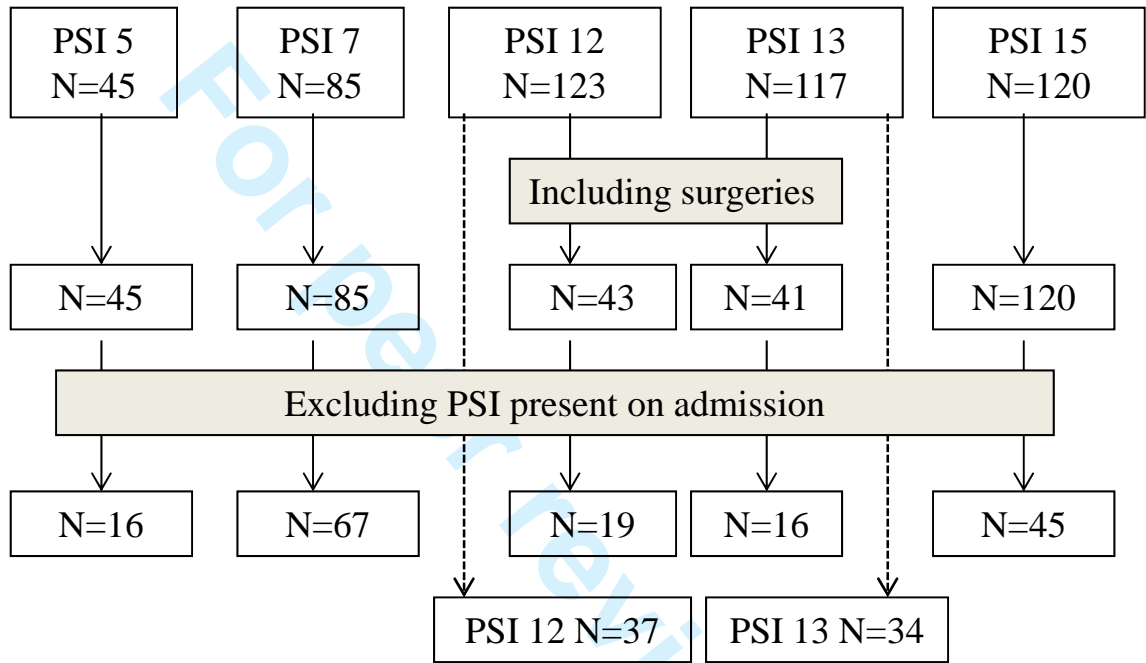

Figure 1: Sample Size by Patient Safety Indicator (PSI)

Appendix 1. Validation studies of Agency for Healthcare Research and Quality (AHRQ) patient safety indicator (PSI)

| Validated PSI and author                                                           | Reference standard, Year of data Country | PPV ( % of N) | Conclusion made by authors                                                                                                                                                                                                                    |
|------------------------------------------------------------------------------------|------------------------------------------|---------------|-----------------------------------------------------------------------------------------------------------------------------------------------------------------------------------------------------------------------------------------------|
| PSI 3: Decubitus ulcer<br>Polancich et al.(1)                                      | Chart review<br>Year 2005<br>US          | 27.1% of 118  | “Administrative data, when used alone, are not sufficient in measuring the true rate of hospital-acquired decubitus ulcers.”                                                                                                                  |
| PSI 4: Failure to rescue<br>Hortitz et al.(2)                                      | Chart review,<br>2004, US                | 50.7% of 2354 | “This indicator may be useful internally to flag possible cases of quality failure but has limitations for external institutional comparisons.”                                                                                               |
| PSI 5: Foreign body left during procedure,<br>Chen et al.(3)                       | Chart review,<br>2003-07, US             | 45% of 93     | "The reported rate of foreign body events as detected by PSI 5 is low in the VA, but occurs in both surgical and medical procedures."                                                                                                         |
| PSI 6: Iatrogenic Pneumothorax<br>Sadeghi et al.(4)                                | Chart review<br>Year 2006-07<br>US       | 78% of 200    | “AHRQ’s iatrogenic pneumothorax indicator can serve in quality of care improvement.”                                                                                                                                                          |
| PSI 7: Infection due to medical care, Zrelak et al. (5)                            | Chart review,<br>2005-07, US             | 54% of 191    | "PSI 7 has a low positive predictive value compared with other PSIs recently studied. Present on admission diagnoses and improved coding for infections related to central venous catheters (implemented October 2007) may improve validity." |
| PSI 7: Central venous catheter-related bloodstream infections, Cevasco et al.(6)   | Chart review,<br>2003-07, US             | 45% of 112    | "As it currently stands, PSI 7 should not be used as a pay-for-performance measure, but should be limited to use in internal quality improvement efforts."                                                                                    |
| PSI 10: Postoperative physiologic and metabolic derangement<br>Borsecki et al. (7) | Chart review,<br>2002-07<br>US           | 63% of 119    | "Due to its low PPV, we recommend removing diabetes complications from the indicator and focusing on AKI."                                                                                                                                    |

| Validated PSI and author                                                                 | Reference standard, Year of data Country | PPV ( % of N)                                       | Conclusion made by authors                                                                                                                                                                                        |
|------------------------------------------------------------------------------------------|------------------------------------------|-----------------------------------------------------|-------------------------------------------------------------------------------------------------------------------------------------------------------------------------------------------------------------------|
| PSI 11: Respiratory failure<br>Utter et al.(8)                                           | Chart review, 2007<br>US                 | 83% of 609                                          | “A hospitalization flagged by PSI 11 is reasonably likely to represent a true postoperative pulmonary complication.”                                                                                              |
| PSI 11: Respiratory failure<br>Borzecki et al.(9)                                        | Chart review<br>Year 2003-07<br>US       | 67% of 112                                          | “PRF should continue to be used as a screen for potential patient-safety events. Its PPV could be substantially improved in the Veterans Health Administration through introduction of an admission status code.” |
| PSI 12: Postoperative venous Thromboembolism and pulmonary embolism,<br>White et al.(10) | Chart review, 2005-07,<br>US             | 79% of 573<br>44% of 452,<br>for lower<br>extremity | “Current PSI 12 criteria do not accurately identify patients with acute postoperative lower extremity DVT or PE.”                                                                                                 |
| PSI 12: Venous thromboembolism and pulmonary embolism,<br>Zhan et al.(11)                | Chart review, 2002-04, US                | 29% of 327                                          | “ICD-9-CM codes in Medicare claims are sensitive but have limited predictive validity in identifying postoperative DVT/PE.”                                                                                       |
| PSI 12: Venous thromboembolism and pulmonary embolism,<br>Henderson et al.(12)           | Chart review, 2004, US                   | 54.5% of 112                                        | “The VTE PSI performed well as a screening tool but generated a significant number of false-positive cases, a problem that could be substantially reduced with improved coding methods.”                          |
| PSI 13: Postoperative sepsis,<br>Cevasco et al.(13)                                      | Chart review, 2005-07                    | 53% of 112<br>41% of 164                            | "As it currently stands, the use of PSI 13 as a stand-alone measure for hospital reporting appears premature"                                                                                                     |
| PSI 14: Postoperative wound dehiscence,<br>Cevasco et al.(14)                            | Chart review, 2003-07, US                | 87% of 112                                          | "This PSI is a promising measure for both quality improvement and performance measurement"                                                                                                                        |
| PSI 15: Accidental puncture or laceration                                                | Chart review<br>Year 2005-07             | 91% of 249                                          | “Although PSI 15 is highly predictive of APL from a coding perspective, the                                                                                                                                       |

| Validated PSI and author                                                                                                                                                                                                                                                     | Reference standard, Year of data Country | PPV ( % of N)                                                                                            | Conclusion made by authors                                                                                                                                                                                                                                                                                               |
|------------------------------------------------------------------------------------------------------------------------------------------------------------------------------------------------------------------------------------------------------------------------------|------------------------------------------|----------------------------------------------------------------------------------------------------------|--------------------------------------------------------------------------------------------------------------------------------------------------------------------------------------------------------------------------------------------------------------------------------------------------------------------------|
| Utter et al.(15)                                                                                                                                                                                                                                                             | US                                       |                                                                                                          | indicator is less predictive of APL that could be considered clinically important."                                                                                                                                                                                                                                      |
| PSI 18 and 19:<br>Obstetric trauma 3 <sup>rd</sup> or 4 <sup>th</sup> degree of perineal laceration<br>Romano et al.(16)                                                                                                                                                     | Chart review<br>Year 1992-93<br>US       | 90% of 62                                                                                                | "Third- and fourth-degree perineal lacerations are accurately reported on hospital discharge abstracts."                                                                                                                                                                                                                 |
| PSI 18 and 19:<br>Obstetric trauma 3 <sup>rd</sup> or 4 <sup>th</sup> degree of perineal laceration,<br>Brubaker et al.(17)                                                                                                                                                  | Chart review<br>Year 2002-04<br>US       | 76.6% of 383                                                                                             | "Discharge coding errors are common after delivery-associated anal sphincter laceration, with omitted codes representing the largest source of errors."                                                                                                                                                                  |
| PSI 19: Postoperative hemorrhage or hematoma<br>Borzecki et al.(18)                                                                                                                                                                                                          | Chart review,<br>2003-07, US             | 75% of 112                                                                                               | "PHH's accuracy could be improved by coding enhancements, such as adopting present on admission codes or associating a timing factor with codes dealing with bleeding control. "                                                                                                                                         |
| PSI 10: Postoperative physiologic and metabolic derangements<br>PSI 11: Postoperative respiratory failure<br>PSI 12: Postoperative pulmonary embolism or deep vein thrombosis<br>PSI 13: Postoperative sepsis<br>PSI 14: Postoperative wound dehiscence<br>Romano et al.(19) | Chart data<br>Year 2001<br>US            | PSI 10: 63% of 62<br>PSI 11: 68% of 344<br>PSI 12: 22% of 241<br>PSI 13: 45% of 32<br>PSI 14: 72% of 274 | "PSI sensitivities and PPVs were moderate. For three of the five PSIs, AHRQ has incorporated our alternative, higher sensitivity definitions into current PSI algorithms. Further validation should be considered before most of the PSIs evaluated herein are used to publicly compare or reward hospital performance." |
| PSI 6: Iatrogenic pneumothorax<br>PSI 12: Postoperative                                                                                                                                                                                                                      | Chart review<br>Year 2003-07<br>US       | PSI 6: 73% of 112<br>PSI 12: 45%                                                                         | "Until coding revisions are implemented, these PSIs, especially pPE/DVT, should be used primarily                                                                                                                                                                                                                        |

| Validated PSI and author                                                                                                                                                                                                                                                                                                                                                                                                                                                                                                                                                               | Reference standard, Year of data Country | PPV ( % of N)                                                                                                                                                                                                                                                | Conclusion made by authors                                                                                                                                                                                                                                                                                  |
|----------------------------------------------------------------------------------------------------------------------------------------------------------------------------------------------------------------------------------------------------------------------------------------------------------------------------------------------------------------------------------------------------------------------------------------------------------------------------------------------------------------------------------------------------------------------------------------|------------------------------------------|--------------------------------------------------------------------------------------------------------------------------------------------------------------------------------------------------------------------------------------------------------------|-------------------------------------------------------------------------------------------------------------------------------------------------------------------------------------------------------------------------------------------------------------------------------------------------------------|
| pulmonary embolus and deep vein thrombosis<br>PSI 15: Accidental puncture and laceration<br>Kaafarani et al.(20)                                                                                                                                                                                                                                                                                                                                                                                                                                                                       |                                          | of 112<br>PSI 15: 85%<br>of 112                                                                                                                                                                                                                              | for screening and case-finding. Their utility for public reporting and pay-for-performance needs to be reassessed."                                                                                                                                                                                         |
| PSI 3: Decubitus ulcer<br>PSI 5: Foreign body left during procedure<br>PSI 6: Iatrogenic pneumothorax<br>PSI 7: Central venous catheter-related bloodstream infections<br>PSI 8: Postoperative hip fracture<br>PSI 9: Postoperative hemorrhage or hematoma<br>PSI 10: Postoperative physiologic and metabolic derangements<br>PSI 11: Postoperative respiratory failure<br>PSI 12: Postoperative pulmonary embolism or deep vein thrombosis<br>PSI 13: Postoperative sepsis<br>PSI 14: Postoperative wound dehiscence<br>PSI 15: accidental puncture or laceration<br>Rosen et al.(21) | Chart review<br>Year 2003-07<br>US       | PSI 3: 30% of 112<br>PSI 5: 93% of 46<br>PSI 6: 73% of 112<br>PSI 7: 38% of 112<br>PSI 8: 28% of 46<br>PSI 9: 75% of 112<br>PSI 10: 63% of 119<br>PSI 11: 67% of 112<br>PSI 12: 43% of 112<br>PSI 13: 53% of 112<br>PSI 14: 87% of 112<br>PSI 15: 85% of 112 | "Overall, PPVs were moderate for most of the PSIs. Implementing POA codes and using more specific ICD-9-CM codes would improve their validity. Our results suggest that additional coding improvements are needed before the PSIs evaluated herein are used for hospital reporting or pay for performance." |
| PSI 9: Postoperative hemorrhage or                                                                                                                                                                                                                                                                                                                                                                                                                                                                                                                                                     | National Surgical                        | Kappa:<br>NSQIP vs.                                                                                                                                                                                                                                          | "The main contributor was difference in definitions, with additional                                                                                                                                                                                                                                        |

| Validated PSI and author                                                                                                                                                     | Reference standard, Year of data Country                                                                | PPV ( % of N)                                                                                                                                                      | Conclusion made by authors                                                                                                                                                                                                                                                                                           |
|------------------------------------------------------------------------------------------------------------------------------------------------------------------------------|---------------------------------------------------------------------------------------------------------|--------------------------------------------------------------------------------------------------------------------------------------------------------------------|----------------------------------------------------------------------------------------------------------------------------------------------------------------------------------------------------------------------------------------------------------------------------------------------------------------------|
| hematoma<br>PSI 11: Postoperative respiratory failure<br>PSI 12: Postoperative pulmonary embolism or deep vein thrombosis<br>PSI 13: Postoperative sepsis<br>Koch et al.(22) | Quality Improvement program (NSQIP)<br>Cardiovascular Information Registry (CVIR)<br>Year 2009-10<br>US | AHRQ, 4583<br>PSI 9: 0.14<br>PSI 11: 0.30<br>PSI 12: 0.60<br>PSI 13: 0.07<br>CVIR vs.<br>AHRQ, 7897<br>PSI 9: 0.08<br>PSI 11: 0.02<br>PSI 12: 0.55<br>PSI 13: 0.16 | contribution from data collection and management methods. Although any of these sources can be used for their original intent of performance improvement, this study emphasizes the shortcomings of using these sources for grading performance without standardizing definitions, data collection, and management." |

## Appendix 2. ICD-10 diagnosis codes for AHRQ patient safety indicator (PSI)

| Code                                        | Description                                                                                                                      |
|---------------------------------------------|----------------------------------------------------------------------------------------------------------------------------------|
| Foreign body left in during procedure       |                                                                                                                                  |
| T815                                        | Foreign body accidentally left in body cavity or operation wound following a procedure                                           |
| T816                                        | Acute reaction to foreign substance accidentally left during a procedure                                                         |
| Y610                                        | Foreign object accidentally left in body during surgical and medical care: During surgical operation                             |
| Y611                                        | Foreign object accidentally left in body during surgical and medical care: During infusion or transfusion                        |
| Y612                                        | Foreign object accidentally left in body during surgical and medical care: During kidney dialysis or other perfusion             |
| Y613                                        | Foreign object accidentally left in body during surgical and medical care: During injection or immunization                      |
| Y614                                        | Foreign object accidentally left in body during surgical and medical care: During endoscopic examination                         |
| Y615                                        | Foreign object accidentally left in body during surgical and medical care: During heart catheterization                          |
| Y616                                        | Foreign object accidentally left in body during surgical and medical care: During aspiration, puncture and other catheterization |
| Y617                                        | Foreign object accidentally left in body during surgical and medical care: During removal of catheter or packing                 |
| Y618                                        | Foreign object accidentally left in body during surgical and medical care: During other surgical and medical care                |
| Y619                                        | Foreign object accidentally left in body during surgical and medical care: During unspecified surgical and medical care          |
| Infections due to medical care              |                                                                                                                                  |
| T80.2                                       | Infections following infusion, transfusion and therapeutic injection                                                             |
| T82.7                                       | Infection and inflammatory reaction due to other cardiac and vascular devices, implants and grafts                               |
| T88.0                                       | Infection following immunization                                                                                                 |
| Pulmonary embolism and deep vein thrombosis |                                                                                                                                  |
| I26.0                                       | Pulmonary embolism with mention of acute cor pulmonale                                                                           |
| I26.9                                       | Pulmonary embolism without mention of acute cor pulmonale                                                                        |
| I80.1                                       | Phlebitis and thrombophlebitis of femoral vein                                                                                   |

| Code                                                                     | Description                                                               |
|--------------------------------------------------------------------------|---------------------------------------------------------------------------|
| I80.2                                                                    | Phlebitis and thrombophlebitis of other deep vessels of lower extremities |
| I80.3                                                                    | Phlebitis and thrombophlebitis of lower extremities, unspecified          |
| I80.8                                                                    | Phlebitis and thrombophlebitis of other sites                             |
| I80.9                                                                    | Phlebitis and thrombophlebitis of unspecified site                        |
| I82.8                                                                    | Embolism and thrombosis of other specified veins                          |
| I82.9                                                                    | Embolism and thrombosis of unspecified vein                               |
| Sepsis                                                                   |                                                                           |
| A400                                                                     | Septicaemia due to streptococcus, group A                                 |
| A401                                                                     | Septicaemia due to streptococcus, group B                                 |
| A402                                                                     | Septicaemia due to streptococcus, group D                                 |
| A403                                                                     | Septicaemia due to Streptococcus pneumoniae                               |
| A408                                                                     | Other streptococcal septicaemia                                           |
| A409                                                                     | Streptococcal septicaemia, unspecified                                    |
| A410                                                                     | Septicaemia due to Staphylococcus aureus                                  |
| A411                                                                     | Septicaemia due to other specified staphylococcus                         |
| A412                                                                     | Septicaemia due to unspecified staphylococcus                             |
| A413                                                                     | Septicaemia due to Haemophilus influenzae                                 |
| A414                                                                     | Septicaemia due to anaerobes                                              |
| A415                                                                     | Septicaemia due to other Gram-negative organisms                          |
| A418                                                                     | Other specified septicaemia                                               |
| A419                                                                     | Septicaemia, unspecified                                                  |
| R578                                                                     | Other shock                                                               |
| T811                                                                     | Shock during or resulting from a procedure, not elsewhere classified      |
| Accidental cut, puncture, perforation, or hemorrhage during medical care |                                                                           |



| Code | Description                                                                                                                                     |
|------|-------------------------------------------------------------------------------------------------------------------------------------------------|
| T812 | Accidental puncture and laceration during a procedure, not elsewhere classified                                                                 |
| Y600 | Unintentional cut, puncture, perforation or haemorrhage during surgical and medical care: During surgical operation                             |
| Y601 | Unintentional cut, puncture, perforation or haemorrhage during surgical and medical care: During infusion or transfusion                        |
| Y602 | Unintentional cut, puncture, perforation or haemorrhage during surgical and medical care: During kidney dialysis or other perfusion             |
| Y603 | Unintentional cut, puncture, perforation or haemorrhage during surgical and medical care: During injection or immunization                      |
| Y604 | Unintentional cut, puncture, perforation or haemorrhage during surgical and medical care: During endoscopic examination                         |
| Y605 | Unintentional cut, puncture, perforation or haemorrhage during surgical and medical care: During heart catheterization                          |
| Y606 | Unintentional cut, puncture, perforation or haemorrhage during surgical and medical care: During aspiration, puncture and other catheterization |
| Y607 | Unintentional cut, puncture, perforation or haemorrhage during surgical and medical care: During administration of enema                        |
| Y608 | Unintentional cut, puncture, perforation or haemorrhage during surgical and medical care: During other surgical and medical care                |
| Y609 | Unintentional cut, puncture, perforation or haemorrhage during surgical and medical care: During unspecified surgical and medical care          |

#### References

- (1) Polancich S, Restrepo E, Prosser J. Cautious use of administrative data for decubitus ulcer outcome reporting. *Am J Med Qual* 2006 Jul;21(4):262-8.
- (2) Horwitz LI, Cuny JF, Cerese J, Krumholz HM. Failure to rescue: validation of an algorithm using administrative data. *Med Care* 2007 Apr;45(4):283-7.
- (3) Chen Q, Rosen AK, Cevasco M, Shin M, Itani KM, Borzecki AM. Detecting patient safety indicators: How valid is "foreign body left during procedure" in the Veterans Health Administration? *J Am Coll Surg* 2011 Jun;212(6):977-83.

- 1  
2  
3 (4) Sadeghi B, Baron R, Zrelak P *et al.* Cases of iatrogenic pneumothorax can be identified  
4 from ICD-9-CM coded data. *Am J Med Qual* 2010 May;25(3):218-24.  
5
- 6  
7 (5) Zrelak PA, Sadeghi B, Utter GH *et al.* Positive predictive value of the Agency for  
8 Healthcare Research and Quality Patient Safety Indicator for central line-related  
9 bloodstream infection ("selected infections due to medical care"). *J Healthc Qual* 2011  
10 Mar;33(2):29-36.  
11
- 12  
13 (6) Cevasco M, Borzecki AM, O'Brien WJ *et al.* Validity of the AHRQ Patient Safety  
14 Indicator "central venous catheter-related bloodstream infections". *J Am Coll Surg* 2011  
15 Jun;212(6):984-90.  
16
- 17  
18 (7) Borzecki AM, Cevasco M, Chen Q, Shin M, Itani KM, Rosen AK. How valid is the  
19 AHRQ Patient Safety Indicator "postoperative physiologic and metabolic derangement"?  
20 *J Am Coll Surg* 2011 Jun;212(6):968-76.  
21
- 22  
23 (8) Utter GH, Cuny J, Sama P *et al.* Detection of postoperative respiratory failure: how  
24 predictive is the Agency for Healthcare Research and Quality's Patient Safety Indicator? *J*  
25 *Am Coll Surg* 2010 Sep;211(3):347-54.  
26
- 27  
28 (9) Borzecki AM, Kaafarani HM, Utter GH *et al.* How valid is the AHRQ Patient Safety  
29 Indicator "postoperative respiratory failure"? *J Am Coll Surg* 2011 Jun;212(6):935-45.  
30
- 31  
32 (10) White RH, Sadeghi B, Tancredi DJ *et al.* How valid is the ICD-9-CM based AHRQ  
33 patient safety indicator for postoperative venous thromboembolism? *Med Care* 2009  
34 Dec;47(12):1237-43.  
35
- 36  
37 (11) Zhan C, Battles J, Chiang YP, Hunt D. The validity of ICD-9-CM codes in identifying  
38 postoperative deep vein thrombosis and pulmonary embolism. *Jt Comm J Qual Patient*  
39 *Saf* 2007 Jun;33(6):326-31.  
40
- 41  
42 (12) Henderson KE, Recktenwald A, Reichley RM *et al.* Clinical validation of the AHRQ  
43 postoperative venous thromboembolism patient safety indicator. *Jt Comm J Qual Patient*  
44 *Saf* 2009 Jul;35(7):370-6.  
45
- 46  
47 (13) Cevasco M, Borzecki AM, Chen Q *et al.* Positive predictive value of the AHRQ Patient  
48 Safety Indicator "Postoperative Sepsis": implications for practice and policy. *J Am Coll*  
49 *Surg* 2011 Jun;212(6):954-61.  
50
- 51  
52 (14) Cevasco M, Borzecki AM, McClusky DA, III *et al.* Positive predictive value of the  
53 AHRQ Patient Safety Indicator "postoperative wound dehiscence". *J Am Coll Surg* 2011  
54 Jun;212(6):962-7.  
55
- 56  
57 (15) Utter GH, Zrelak PA, Baron R *et al.* Positive predictive value of the AHRQ accidental  
58 puncture or laceration patient safety indicator. *Ann Surg* 2009 Dec;250(6):1041-5.  
59  
60

- 1  
2  
3  
4  
5  
6  
7  
8  
9  
10  
11  
12  
13  
14  
15  
16  
17  
18  
19  
20  
21  
22  
23  
24  
25  
26  
27  
28  
29  
30  
31  
32  
33  
34  
35  
36  
37  
38  
39  
40  
41  
42  
43  
44  
45  
46  
47  
48  
49  
50  
51  
52  
53  
54  
55  
56  
57  
58  
59  
60
- (16) Romano PS, Yasmeeen S, Schembri ME, Keyzer JM, Gilbert WM. Coding of perineal lacerations and other complications of obstetric care in hospital discharge data. *Obstet Gynecol* 2005 Oct;106(4):717-25.
- (17) Brubaker L, Bradley CS, Handa VL *et al.* Anal sphincter laceration at vaginal delivery: is this event coded accurately? *Obstet Gynecol* 2007 May;109(5):1141-5.
- (18) Borzecki AM, Kaafarani H, Cevasco M *et al.* How valid is the AHRQ Patient Safety Indicator "postoperative hemorrhage or hematoma"? *J Am Coll Surg* 2011 Jun;212(6):946-53.
- (19) Romano PS, Mull HJ, Rivard PE *et al.* Validity of selected AHRQ patient safety indicators based on VA National Surgical Quality Improvement Program data. *Health Serv Res* 2009 Feb;44(1):182-204.
- (20) Kaafarani HM, Borzecki AM, Itani KM *et al.* Validity of selected patient safety indicators: opportunities and concerns. *J Am Coll Surg* 2011 Jun;212(6):924-34.
- (21) Rosen AK, Itani KM, Cevasco M *et al.* Validating the patient safety indicators in the Veterans Health Administration: do they accurately identify true safety events? *Med Care* 2012 Jan;50(1):74-85.
- (22) Koch CG, Li L, Hixson E, Tang A, Phillips S, Henderson JM. What are the real rates of postoperative complications: elucidating inconsistencies between administrative and clinical data sources. *J Am Coll Surg* 2012 May;214(5):798-805.



**Validity of AHRQ Patient Safety Indicators Derived from ICD-10 Hospital Discharge Abstract Data (Chart Review Study)**

|                                 |                                                                                                                                                                                                                                                                                                                                                                                                                                 |
|---------------------------------|---------------------------------------------------------------------------------------------------------------------------------------------------------------------------------------------------------------------------------------------------------------------------------------------------------------------------------------------------------------------------------------------------------------------------------|
| Journal:                        | <i>BMJ Open</i>                                                                                                                                                                                                                                                                                                                                                                                                                 |
| Manuscript ID:                  | bmjopen-2013-003716.R1                                                                                                                                                                                                                                                                                                                                                                                                          |
| Article Type:                   | Research                                                                                                                                                                                                                                                                                                                                                                                                                        |
| Date Submitted by the Author:   | 28-Aug-2013                                                                                                                                                                                                                                                                                                                                                                                                                     |
| Complete List of Authors:       | Quan, Hude; University of Calgary, Community Health Sciences Eastwood, Cathy; University of Calgary, Faculty of Nursing Cunningham, Ceara; University of Calgary, Community Health Sciences Liu, Mingfu; Alberta Health Services, Flemons, Ward; University of Calgary, Medicine De Coster, Carolyn; University of Calgary, Community Health Sciences; Alberta Health Services, Ghali, William; Univeristy of Calgary, Medicine |
| <b>Primary Subject Heading</b>: | Health services research                                                                                                                                                                                                                                                                                                                                                                                                        |
| Secondary Subject Heading:      | Health informatics, Health services research, Epidemiology                                                                                                                                                                                                                                                                                                                                                                      |
| Keywords:                       | Health & safety < HEALTH SERVICES ADMINISTRATION & MANAGEMENT, Quality in health care < HEALTH SERVICES ADMINISTRATION & MANAGEMENT, EPIDEMIOLOGY, Health policy < HEALTH SERVICES ADMINISTRATION & MANAGEMENT                                                                                                                                                                                                                  |
|                                 |                                                                                                                                                                                                                                                                                                                                                                                                                                 |

SCHOLARONE™  
Manuscripts

1  
2  
3 **Title: Validity of AHRQ Patient Safety Indicators Derived from ICD-10 Hospital**  
4  
5 **Discharge Abstract Data (Chart Review Study)**  
6  
7

8 Running header: Validating Patient Safety Indicators in ICD-10 Data  
9

10  
11 Hude Quan MD PhD<sup>1\*</sup>, Cathy Eastwood, MN<sup>2</sup>, Ceara Tess Cunningham MA<sup>1</sup>, Mingfu Liu<sup>3</sup> PhD,  
12  
13 Ward Flemons MD<sup>4</sup>, Carolyn De Coster PhD<sup>1,3</sup>, William A Ghali MD MPH<sup>1,4</sup> for the IMECCHI  
14  
15 investigators  
16  
17

18  
19 \*Correspondence:  
20

21 Hude Quan  
22

23 Department of Community Health Sciences  
24

25 University of Calgary  
26

27  
28 3280 Hospital Dr. NW, Calgary, Alberta, Canada, T2N 4Z6  
29

30 Telephone: (403) 210 8617  
31

32 Fax: (403) 210 3818  
33

34 E-mail: [hquan@ucalgary.ca](mailto:hquan@ucalgary.ca)  
35  
36  
37  
38  
39

40 <sup>1</sup> Department of Community Health Sciences, University of Calgary, Canada  
41

42 <sup>2</sup> Faculty of Nursing, University of Calgary, Canada  
43

44 <sup>3</sup> Alberta Health Services, Alberta, Canada  
45

46 <sup>4</sup> Department of Medicine, University of Calgary, Canada  
47  
48  
49

50 Key words: ICD-10, patient safety, outcome, administrative data  
51

52 Word count: 2,954; Tables: 3, Figure: 1, Supplementary Material: Appendix: 1 and 2 for on-line  
53  
54  
55  
56  
57  
58  
59  
60

## ARTICLE SUMMARY

### 1) Article focus

- The Agency for Healthcare Research and Quality (AHRQ) patient safety indicators (PSIs) have been broadly used to assess the occurrence of adverse events and in-hospital complications using routinely collected administrative data.

- Estimates of PSIs could be caused by true quality of care differences or by differences in data quality.

- This study estimated 'true positives' of PSIs derived from Canadian ICD-10 hospital discharge abstract data with flag of presence on admission using chart review as a reference standard.

### 2) Key messages

- The validity of ICD-10 data varied by PSI.

- PSIs could be used to screen potential cases with adverse events using administration data.

Confirming the presence of these events needs additional clinical information.

- If PSIs are used for comparison of jurisdiction performance, validity of data has to be adjusted for and considered in the analysis.

### 3) Strengths and Limitations

- To our knowledge, this is the first validation of ICD-10 data in recording AHR PSIs.

- We validated 5 out of 20 PSIs.

- Chart data were used as the reference standard; conditions not documented in chart were missing.

**ABSTRACT**

Objective: To assess if AHRQ PSIs could be used for case-findings in International Classification of Disease (ICD)-10 hospital discharge abstract data.

Design: We identified and randomly selected 490 patients with foreign body left during a procedure (PSI 5-foreign body), selected infections (IV site) due to medical care (PSI 7-infection), post-operative pulmonary embolism or deep vein thrombosis (PSI 12-PE/DVT), post-operative sepsis (PSI 13-sepsis), and accidental puncture or laceration (PSI 15-laceration) among patients discharged from three adult acute care hospitals in Calgary, Canada in 2007 and 2008. Their charts were reviewed for determining presence of PSIs and used as the reference standard, PPV statistics were calculated to determine the proportion of positives in the administrative data was 'true positives'.

Results: The PPV for PSI 5-foreign body was 62.5% (95% confidence interval: 35.4% - 84.8%), PSI 7-infection was 79.1% (67.4% - 88.1%), PSI 12-PE/DVT was 89.5% (66.9% - 98.7), PSI 13-sepsis was 12.5% (1.6% - 38.4%) and PSI 15-laceration was 86.4% (75.0% - 94.0%) after excluding those who presented to the hospital with the condition.

Conclusions: Several PSIs had high PPV in ICD administrative data and are thus powerful tools for true positive case-finding. The tools could be used to identify potential cases from large volume of admissions for verification through chart review. In contrast, their sensitivity has not been well-characterized and users of PSIs should be cautious if using these for 'quality of care reporting' presenting rate of PSIs because under-coded data would generate falsely low PSI rates.

Key words: ICD-10, patient safety, outcome, administrative data

## INTRODUCTION

1  
2  
3  
4  
5  
6  
7  
8  
9  
10  
11  
12  
13  
14  
15  
16  
17  
18  
19  
20  
21  
22  
23  
24  
25  
26  
27  
28  
29  
30  
31  
32  
33  
34  
35  
36  
37  
38  
39  
40  
41  
42  
43  
44  
45  
46  
47  
48  
49  
50  
51  
52  
53  
54  
55  
56  
57  
58  
59  
60

Patient safety is a critical component of health care quality. Assessments of patient safety are traditionally done through chart review, survey and voluntary reporting of adverse events and medical errors (1;2). These data collection methods focus on a specific type of event, collect data from non-random and biased populations, cover limited geographic areas, or are too labor-intensive for widespread use. Therefore, researchers have paid great attention to routinely collected hospital discharge abstract administrative data for population-based studies of adverse events(3). Therefore, the Agency for Healthcare Research and Quality (AHRQ) conducted pioneering work to develop patient safety indicators for use with the International Classification of Disease, 9<sup>th</sup> version, Clinical Modification (ICD-9-CM) administrative data, which cover large geographic areas and are readily available and relatively inexpensive to use.

AHRQ PSIs were developed through a literature search, review of ICD-9-CM manuals, consultation with physician panels, and empirical data analyses. Over 200 ICD-9-CM codes representing potential patient safety problems were identified and 48 indicators were labeled as the most promising PSIs by the AHRQ research team. Of these, 20 hospital-level and 7 area-level PSIs were recommended by one or more multi-specialty panels as a set of ‘accepted’ indicators(4). To facilitate utilization of PSIs, AHRQ developed and distributed (at no cost) SAS and SPSS software tools. The PSIs can be used to help hospitals identify potential adverse events that might need further study and also provide an opportunity to assess the occurrence of adverse events and in-hospital complications using routinely collected administrative data.

The AHRQ PSIs have been broadly used to assess the occurrence of adverse events and in-hospital complications by many international and national agencies, including Organization for Economic Cooperation and Development. Drosler et al.(5;6) analyzed hospital discharge



1  
2  
3 abstract administrative data from multiple countries and found that PSI rates varied across  
4 countries. The variation in the PSI estimate could be caused by true quality of care differences  
5 or by differences in data quality.  
6  
7  
8  
9

10 Administrative data has possible limitations for identifying complications that represent  
11 medical error or may be at least in some way preventable. (4) First, administrative data are  
12 unlikely to capture all cases of a complication, regardless of the preventability, without false  
13 positives and false negatives. Second, when the ICD codes are accurate in defining an event, the  
14 clinical vagueness inherent in the description of the code itself may lead to a highly  
15 heterogeneous pool of clinical states represented by that code. Third, incomplete reporting may  
16 compromise the accuracy of any data source used for identifying patient safety problems, as  
17 medical providers might fear adverse consequences of “full disclosure” in potentially public  
18 records such as discharge abstracts. Fourth, the ability of these data to distinguish events in  
19 which no error occurred from true medical errors is uncertain.  
20  
21  
22  
23  
24  
25  
26  
27  
28  
29  
30  
31  
32  
33

34 Data quality is commonly evaluated using four statistical parameters. Sensitivity is a  
35 measure of the accuracy of recording presence of PSIs in administrative data when these are  
36 truly present according to reference data (i.e. gold standard). Specificity is to determine the  
37 accuracy of reporting absence of these PSIs in the administrative data when these PSIs are absent  
38 in the reference data. Positive predictive value (PPV) and negative predictive value (NPV) are to  
39 determine the extent to which PSIs present in the administrative data are also present in the  
40 reference data or the extent to which a condition absent in the administrative data are truly absent  
41 according to the reference data.  
42  
43  
44  
45  
46  
47  
48  
49  
50  
51  
52  
53  
54  
55  
56  
57  
58  
59  
60

1  
2  
3  
4  
5  
6  
7  
8  
9  
10  
11  
12  
13  
14  
15  
16  
17  
18  
19  
20  
21  
22  
23  
24  
25  
26  
27  
28  
29  
30  
31  
32  
33  
34  
35  
36  
37  
38  
39  
40  
41  
42  
43  
44  
45  
46  
47  
48  
49  
50  
51  
52  
53  
54  
55  
56  
57  
58  
59  
60

PSIs could be used for case-finding or/and quality of care reporting. When PSIs are used for case-finding and PPV is low, chart review or investigation is required to verify the true case status after identification of cases from the administrative data. When PSIs are used to generate 'quality of care report' presenting rates, all of these four statistical parameters of validity (i.e. sensitivity, specificity, NPV and PPV) should be high.

PSIs have been validated using chart data as 'gold standard' or 'reference' in the USA ICD-9-CM data only (see Appendix 1). Many countries have employed ICD-10 for coding hospital discharge abstract data(7). However, the validity of PSIs in ICD-10 data has not been studied. Therefore, we conducted this study to estimate PPV or 'true positives' of PSIs derived from Canadian ICD-10 hospital discharge abstract data with flag of presence on admission using chart review as a reference standard.

## METHODS

### Identify patients at risk for each of 5 PSIs from ICD-10 data

Of the AHRQ PSIs, we assessed PPV for 5 PSIs, which are likely to have high PPVs based on literature (see Appendix 1), including foreign body left during procedure (PSI 5 - foreign body), selected infections (IV site) due to medical care (PSI 7 - infection), postoperative pulmonary embolism or deep vein thrombosis (PSI 12 - PE/DVT), postoperative sepsis (PSI 13 - sepsis), and accidental puncture or laceration (PSI 15 - laceration).

Our study sample was patients discharged in the years 2007 and 2008 from all three adult acute care hospitals in Calgary, Canada, a city with a population of just over one million. Professionally trained health records coders in Calgary code up to 50 diagnosis codes and 20 procedures for each patient using ICD-10-CA/CCI (Canadian ICD-10 and Canadian

1  
2  
3 Classification of Intervention)(8). One coordinator supervises and manages the coding practice at  
4  
5 the three sites to establish a consistent approach to coding.  
6  
7

8 We developed ICD-10 PSI algorithm(9) based on AHRQ ICD-9-CM PSI definition  
9  
10 manual as the blueprint (see ICD-10 codes in Appendix 2). PSIs in the data were defined using  
11  
12 the ICD-10 codes in the 49 secondary diagnosis coding fields. We included patients with those  
13  
14 ICD-10 codes. Earliest admission date was assigned to patients as the index date for those with  
15  
16 multiple admissions in the study period. Adverse events (e.g. pulmonary embolism) are likely  
17  
18 coded in the index admission as adverse events. Sometimes adverse events are not coded in the  
19  
20 index admission but could be coded as the most responsible diagnosis for a subsequent  
21  
22 admission. We missed these cases because timing of adverse event was not recorded for the  
23  
24 primary diagnosis. The indexed patients were stratified by the three hospitals and 50 patients  
25  
26 were randomly selected per hospital for each PSI when there were more than 50 patients  
27  
28 available. We aimed to review 40 patients at each hospital for each PSI, since at least 30 patients  
29  
30 should be reviewed for calculating PPV(10). Because PSI 5, foreign body left in during  
31  
32 procedure, occurs rarely, we expanded the observation period for this PSI to 2006-2009 to  
33  
34 increase the number of patients. However, we did not reach the target sample size for PSI 5 and 7.  
35  
36 An operating room procedure was defined using the code for inpatient procedure room type: '1'  
37  
38 for main operating room, '8' for cardiac catheterization laboratory or '9' for ambulatory care  
39  
40 operating room. Patients who underwent surgeries in the same day or emergency room were not  
41  
42 included because our administrative data does not capture these services.  
43  
44  
45  
46  
47  
48  
49

### 50 **Review charts to determine presence and absence of PSIs**

51  
52 Corresponding patient charts for the sampled patients were located using a combination  
53  
54 of the patient chart number and personal health number, which uniquely identifies each patient  
55  
56  
57  
58  
59  
60

1  
2  
3 and admission. Two chart reviewers underwent training and practice in the data extraction  
4  
5 process using the PSI data collection tools developed by AHRQ(11). In the training session, the  
6  
7 definition of study variables was discussed. Then the reviewers extracted data independently for  
8  
9 evidence of PSIs through an examination of the entire chart, including the cover page, discharge  
10  
11 summaries, pathology reports (including autopsy reports), trauma and resuscitation records,  
12  
13 admission notes, consultation reports, surgery/operative reports, anesthesia reports,  
14  
15 interdisciplinary progress notes, and physician daily progress notes. The reviewers followed the  
16  
17 AHRQ definitions to determine the presence or absence of the five PSIs, and specified whether  
18  
19 these events were present at the time of admission or arose during hospitalization. In the period  
20  
21 of data collection, they discussed cases with uncertainty in determining conditions to ensure the  
22  
23 consistency between them.  
24  
25  
26  
27  
28

### 29 **Statistical analysis**

30  
31 The ICD-10 administrative data and chart review data were linked and the linked data  
32  
33 were analyzed using statistical software of SAS 9.2. Study populations were characterized using  
34  
35 descriptive statistics. As mentioned above, we calculated PPV and its 95% confidence interval  
36  
37 for each PSI recorded in ICD-10 hospital discharge data accepting the chart review data as a  
38  
39 ‘reference standard’. PPV determines the extent to which a PSI present in the ICD-10 data was  
40  
41 also present in the chart review data. Unit of analysis is patient because one discharge abstract  
42  
43 record and chart was assigned to each patient. Ethics approval for this study was granted by the  
44  
45 Conjoint Health Research Ethics Board at the University in the city in which the study took place  
46  
47  
48  
49  
50  
51  
52 Extra or additional information on data is available by emailing the lead author HQ.

### 53 **RESULTS**

1  
2  
3 A total of 490 patients were included from ICD-10 hospital discharge abstract data. There  
4  
5 were 334 patients after excluding non-surgical patients for PSI 12 - EP/DVT and PSI 13 - sepsis  
6  
7 (see Figure 1) and 163 patients after excluding those with PSIs present on admission. We  
8  
9 reviewed all charts of 490 patients.  
10  
11

12  
13 Among 334 patients, the mean age ranged from 57.9 to 67.2 years across the 5 PSIs (see  
14  
15 Table 1). The proportion of male patients was lowest for PSI 13 - sepsis (36.6%) and highest for  
16  
17 PSI 7 -infection (55.3%). Patients with PSI 7-infection, 12-PE/DVT, or 13-sepsis stayed in  
18  
19 hospital 32.7, 41.3 and 43.9 days on average.  
20  
21

22  
23 Some countries do not code whether the condition was present at admission or arose  
24  
25 during the hospital stay. When conditions present on admission were included (see Table 2), the  
26  
27 PPV was 35.6% for PSI 5-foreign body, 70.6% for PSI 7-infection, 79.0% for PSI 12-PE/DVT,  
28  
29 9.8% for PSI 13-sepsis and 90.8% for PSI 15-laceration. When conditions present on admission  
30  
31 were excluded from the analysis, the PPV increased for PSI 5-foreign body (62.5%), 7-infection  
32  
33 (79.1%), 12-PE/DVT (89.5%) and 13-sepsis (12.5%) but decreased for PSI 15-laceration (from  
34  
35 90.8% to 86.4%).  
36  
37

38  
39 Considering some countries may not code procedures in administrative data, we  
40  
41 evaluated the PPV among 123 PSI 12-PE/DVT patients and 117 PSI 13-sepsis patients ignoring  
42  
43 surgical status. The PPV was 25.2% for PSI 12-PE/DVT, and 27.4% for PSI 13-sepsis. When  
44  
45 present on admission was considered, the PPV increased to 27.0% for PSI 12-PE/DVT, and  
46  
47 47.1% for PSI 13-sepsis. The reasons for misclassification of PSI conditions in administrative  
48  
49 data varied across PSIs (see Table 3). The most common reason was that the condition was  
50  
51 present on admission.  
52  
53  
54  
55  
56  
57  
58  
59  
60

## DISCUSSION

Like previous PSI validation studies in ICD-9-CM data, we focused on the PPV in ICD-10 administrative data as the foremost of interest. Our study revealed that PSI PPVs in most instances are sufficiently high to support widespread use for case findings. The low PPVs for some PSIs, such as sepsis do not support utility of the PSIs for quality of care reporting for comparisons across jurisdictions.

The validity of ICD-10 data varied by PSI. PSI 5-foreign body and 13-sepsis had low PPV but PSI 7-infection, 12-PE/DVT and 15-laceration had high PPV. The high PPV for PSI 12-PE/DVT (89.5%) is supported by one US study(12) (PPV=79%), but is higher than four other US studies (PPV=22-55%)(13-16). In contrast to our finding for PSI 13-sepsis (PPV=9.8%), Romano et al.(15) reported a higher PPV for PSI 13-sepsis (45%). As our finding PPV for PSI 15-laceration (PPV=90.8%), Kaafarani et al.(16) and Utter(17) et al. reported high PPV for PSI 15-laceration (91% and 85%, respectively).

Because low prevalence PSIs with reasonable precision (i.e. 95% confidence intervals) requires reviewing many charts for calculating sensitivity, all previous studies except for the study conducted by Koch et al.(18) evaluated data quality using PPV. The PPV value depends on prevalence and varies greatly across PSIs and studies. For example, the PPV for PSI 12-PE/DVT ranged from 22% to 79% across studies conducted in USA(12-16). Koch et al.(18) compared agreement between ICD-9-CM data, National Surgical Quality Improvement Program (NSQIP) and Cardiovascular Information Registry (CVIR) in PSIs. The agreement was substantial for PSI 12-PE/DVT and poor for PSI 9-hemorrhage, PSI 11-respiratory failure and PSI 13-sepsis. Sensitivity was very low, for example 0.13% for PSI 9-hemorrhage, 1.35% for PSI 11-

1  
2  
3 respiratory failure, 1.6% for PSI 12-PE/DVT and 0.13% for PSI 13-sepsis when ICD-9-CM and  
4  
5 NSQIP were compared.  
6  
7

8 Variation in validity across PSIs is determined by factors related to physicians (i.e., chart  
9  
10 documentation), and coders (i.e., coding guidelines and coders' practice). Coders code medical  
11  
12 events after discharge based on chart documentation. We used chart review as our reference  
13  
14 standard; therefore, completeness of chart documentation could not be evaluated. Physicians  
15  
16 might not document consequences of medical care in charts, leading to under-coding in hospital  
17  
18 discharge abstracts. In addition, coders at hospitals are allotted a specific amount of time per  
19  
20 chart on average, for example, 30 minutes in Alberta. Thus, they might focus on coding  
21  
22 diagnoses and procedures that contribute significantly to length of stay such as PE/DVT, and  
23  
24 ignore minor conditions such as infection or laboratory results that indicate sepsis, to follow  
25  
26 Canada national coding guidelines. Our reviewers focused on determining the presence or  
27  
28 absence of conditions based on all documented information in the chart, including diagnostic  
29  
30 imaging and laboratory results. This is in contrast to general coding guidelines(8) that instruct  
31  
32 coders to confine their coding to clinical problems, conditions, or circumstances that are  
33  
34 identified in the record by the treating physicians as the clinically significant reason for the  
35  
36 patient's admission, or that require or influence evaluation, treatment, management, or care.  
37  
38 Coders do not typically code problems that do not meet these requirements, whereas the  
39  
40 reviewers who conducted our 'reference standard' chart review included them regardless of the  
41  
42 significance of the condition on resource use during hospitalization. Coders are instructed that  
43  
44 when a condition is suggested by diagnostic test results, they should only code the condition if it  
45  
46 has been confirmed by physician documentation. Our previous studies demonstrated that hospital  
47  
48  
49  
50  
51  
52  
53  
54  
55  
56  
57  
58  
59  
60

1  
2  
3 discharge abstract data quality is not related to coders' employment status (full-time/part time  
4 and length of employment) but related to physician documentation quality(19;20).  
5  
6  
7

8 Excluding conditions present on admission improves PSI validity. For example, the PPV  
9 for PSI 12-PE/DVT increased from 79.0% to 89.5% from including to excluding the presence of  
10 the condition on admission. Canada has a long history of flagging timing of condition occurrence.  
11  
12 Some US and Australian states currently have similar data elements in their discharge abstract  
13 data, and the US has recently begun coding the timing of conditions nation-wide. Timing of  
14 condition occurrence is not aimed at judging causal relationships between medical care and  
15 complications, just flagging whether the condition occurred or was diagnosed during the  
16 hospitalization. To capture complications, Japan has specified fields for coding complications in  
17 its hospital discharge data, in addition to diagnoses and procedures.  
18  
19  
20  
21  
22  
23  
24  
25  
26  
27  
28

29 Could AHRQ PSIs derived from hospital discharge abstract data be utilized for  
30 comparing quality of care across countries and/or jurisdictions, or for monitoring system  
31 performance in an institution? Because data quality contributes to the magnitude of PSIs, data  
32 validity has to be similar across comparison groups (such as countries, regions or jurisdictions)  
33 and over time. Thus, PSIs should not be compared across jurisdictions without validation  
34 because adjustment for data validity is necessary. Our findings suggest that PSIs could be used to  
35 screen potential cases with adverse events using administration data. Confirming the presence of  
36 these events needs additional clinical information such as chart reviews. If PSIs are used for  
37 comparison, validity of data has to be adjusted and considered for in the analysis.  
38  
39  
40  
41  
42  
43  
44  
45  
46  
47  
48  
49

50 While PSIs are used for monitoring quality of care improvement over time, the  
51 assumption of temporal consistency of data validity has to be met. Unfortunately, we did not  
52 evaluate PSI validity over time. Quan et al.(21) evaluated the impact of ICD-10 implementation  
53  
54  
55  
56



1  
2  
3 on data quality through chart review of 32 conditions. Canadian ICD-10 data had significantly  
4 higher sensitivity for one condition and lower sensitivity for seven conditions relative to ICD-9-  
5 CM data. The two databases had similar sensitivity values for the remaining 24 conditions.  
6  
7  
8 Walker(22) et al. compared coding practice between ICD-9-CM and ICD-10 and reported that  
9 the number of diagnoses coded decreased in four Canadian provinces and remained similar in  
10 other five provinces after implementation of ICD-10. Januel JM(23) et al. reported that of 36  
11 conditions assessed in Switzerland, Kappa values for ICD-10 and chart data increased for 29  
12 conditions and decreased for seven conditions compared with ICD-9-CM and chart data.  
13  
14  
15  
16  
17  
18  
19  
20  
21

22 Our study has limitations. First, of 20 AHRQ PSIs, we intentionally evaluated five  
23 conditions that might have a high validity. Remaining PSIs should be evaluated in future studies.  
24  
25 Second, we used chart data as the reference standard; conditions not documented in chart were  
26 missing. Prospective data collection through clinical examination on these events should be  
27 conducted to establish near gold standard. Third, this study was conducted in one urban area; the  
28 validity of PSIs might vary by institutions or regions. Fourth, we evaluated the validity using  
29 PPV alone. Sensitivity, specificity and NPV should be assessed for all of the PSIs. The  
30 ascertainment of the sensitivity requires a large sample size and involves expensive and time  
31 consuming resources due to low prevalence rate of PSIs. Fifth, the sample sizes for certain PSIs  
32 are small and 95% confidence interval is relatively wide.  
33  
34  
35  
36  
37  
38  
39  
40  
41  
42  
43  
44  
45

46 In conclusion, our study supports that PSIs could be used for case-findings in the ICD-10  
47 hospital discharge abstract data. Even PSIs with low PPVs could be used to identify potential  
48 cases from large volume of admissions for verification through chart review. In contrast, their  
49 sensitivity has not been well-characterized because of the inherent challenges of reviewing huge  
50 numbers of charts for properly testing sensitivity. Therefore, users of PSIs should be cautious if  
51  
52  
53  
54  
55  
56  
57  
58  
59  
60

1  
2  
3 using these for 'quality of care reporting' presenting rate of PSIs because under-coded data would  
4  
5 generate falsely low PSI rates.  
6  
7  
8  
9  
10  
11  
12  
13  
14  
15  
16  
17  
18  
19  
20  
21  
22  
23  
24  
25  
26  
27  
28  
29  
30  
31  
32  
33  
34  
35  
36  
37  
38  
39  
40  
41  
42  
43  
44  
45  
46  
47  
48  
49  
50  
51  
52  
53  
54  
55  
56  
57  
58  
59  
60

For peer review only

Table 1. Characteristics of patients by AHRQ patient safety indicator (PSI)

|                     | PSI 5<br>Foreign body<br>left during<br>procedure<br><br>N= 45 | PSI 7<br>Selected<br>infections<br>due to<br>medical care<br><br>N=85 | PSI12<br>Postoperative<br>pulmonary<br>embolism or<br>deep vein<br>thrombosis<br><br>N=43 surgery<br>patients | PSI13<br>Postoperative<br>sepsis<br><br>N=41 surgery<br>patients | PSI15<br>Accidental<br>puncture or<br>laceration<br><br>N=120 |
|---------------------|----------------------------------------------------------------|-----------------------------------------------------------------------|---------------------------------------------------------------------------------------------------------------|------------------------------------------------------------------|---------------------------------------------------------------|
| Age Mean<br>(Range) | 58.0<br>(21.6 – 93.5)                                          | 61.7<br>(18.5 – 90.0)                                                 | 67.2<br>(31.0 – 94.0)                                                                                         | 63.9<br>(19.9 – 83.5)                                            | 57.9<br>(19.3 – 96.5)                                         |
| Sex (male)          | 24<br>(53.3%)                                                  | 47<br>(55.3%)                                                         | 23<br>(53.5%)                                                                                                 | 15<br>(36.6%)                                                    | 44<br>(36.7%)                                                 |
| Length of<br>stay   | 14.7<br>(1 – 195)                                              | 32.7<br>(2 – 184.0)                                                   | 41.3<br>(2 - 274)                                                                                             | 43.9<br>(1 – 238)                                                | 16.2<br>(1. – 181)                                            |

Table 2. Positive predictive value and 95% confidence interval (95% CI) for AHRQ patient safety indicators (PSI) recorded in ICD-10 hospital discharge abstract administrative data comparing chart data

| Patient Safety Indicator                                                                | Including PSIs present on admission<br>% (n/N, 95% CI) | Excluding PSIs present on admission<br>% (n/N, 95% CI) |
|-----------------------------------------------------------------------------------------|--------------------------------------------------------|--------------------------------------------------------|
| PSI 5 Foreign body left during procedure                                                | 35.6% (16/45)<br>(21.9% - 51.2%)                       | 62.5% (10/16)<br>(35.4% - 84.8%)                       |
| PSI 7 Selected infections due to medical care                                           | 70.6% (60/85)<br>(59.7% - 80.0%)                       | 79.1% (53/67)<br>(67.4% - 88.1%)                       |
| PSI12 Postoperative pulmonary embolism or deep vein thrombosis among surgery patients   | 79.0% (34/43)<br>(64.0% - 90.0%)                       | 89.5% (17/19)<br>(66.9% - 98.7)                        |
| PSI13 Postoperative sepsis among surgery patients                                       | 9.8% (4/41)<br>(2.7% - 23.1%)                          | 12.5% (2/16)<br>(1.6% - 38.4%)                         |
| PSI15 Accidental puncture or laceration                                                 | 90.8% (109/120)<br>(84.2% - 95.3%)                     | 86.4% (51/59)<br>(75.0% - 94.0%)                       |
| When surgical status was ignored                                                        |                                                        |                                                        |
| PSI12 Pulmonary embolism or deep vein thrombosis among surgery and non-surgery patients | 25.2% (31/123)<br>(17.8% - 33.8%)                      | 27.0% (10/37)<br>(13.8% - 44.1%)                       |
| PSI13 Postoperative sepsis among surgery or non-surgery patients                        | 27.4% (32/117)<br>(19.5% - 36.4%)                      | 47.1% (16/34)<br>(29.8% - 64.9%)                       |

Table 3. Reasons for false positives of AHRQ patient safety indicators (PSI) in ICD-10 hospital discharge abstract administrative data when the indicator of presence on admission was ignored.

| PSI 5                                             | PSI 7                                        | PSI 12                                                   | PSI 13                               | PSI 15                                  |
|---------------------------------------------------|----------------------------------------------|----------------------------------------------------------|--------------------------------------|-----------------------------------------|
| Foreign body left during procedure                | Selected infections due to medical care      | Postoperative pulmonary embolism or deep vein thrombosis | Post operative sepsis                | Accidental puncture or laceration       |
| N=29                                              | N=25                                         | N=9                                                      | N=37                                 | N=11                                    |
| 18- present on admission                          | 7- present on admission                      | 6- present on admission                                  | 15- present on admission             | 4 – present on admission                |
| 8– no foreign body                                | 11 – unrelated to medical care               | 2 – had DVT/PE in past                                   | 12 – urgent surgeries, having sepsis | 7 –no accidental puncture or laceration |
| 2 – for treatment purposes (e.g. packing, stitch) | 5 – IV site bruised or injured, no infection | 1 – no DVT/PE                                            | 6 – urgent surgeries, no sepsis      |                                         |
| 1 – patient pulled and broke catheter             | 2 – conflicting documentation                |                                                          | 2 – no sepsis                        |                                         |
|                                                   |                                              |                                                          | 2 – no surgery, sepsis               |                                         |

## ACKNOWLEDGEMENTS

Dr Quan and Ghali are supported by Alberta Innovates- Health Solutions salary awards. Dr Ghali is supported by Government of Canada Chairs. IMECCHI investigators are listed at [www.IMECCHI.org](http://www.IMECCHI.org)

## COMPETING INTERESTS

None to declare.

## FUNDING

This work was supported by Canadian Institutes of Health Research grant number 172490.

## CONTRIBUTOR STATEMENT

Hude Quan: Conception and design, acquisition of data, analysis, interpretation of data, and final approval of the version to be published.

Cathy Eastwood: Acquisition of data, interpretation of data, critical revision and final approval of the version to be published.

Ceara Tess Cunningham: Acquisition of data, interpretation of data, critical revision and final approval of the version to be published.

Mingfu Liu: Acquisition of data, analysis, interpretation of data, critical revision and final approval of the version to be published.

1  
2  
3 Ward Flemons: Conception and design, interpretation of data, critical revision and final approval  
4  
5 of the version to be published.  
6  
7

8  
9 Carolyn De Coster: Conception and design, interpretation of data, critical revision and final  
10  
11 approval of the version to be published.  
12  
13

14  
15 William A Ghali: Conception and design, interpretation of data, critical revision and final  
16  
17 approval of the version to be published.  
18  
19

20  
21 **Data Sharing:** Hude Quan will provide aggregated statistical data, not individual and raw data.  
22  
23  
24  
25  
26  
27  
28  
29  
30  
31  
32  
33  
34  
35  
36  
37  
38  
39  
40  
41  
42  
43  
44  
45  
46  
47  
48  
49  
50  
51  
52  
53  
54  
55  
56  
57  
58  
59  
60

## References

- (1) Baker GR, Norton PG. Adverse events and patient safety in Canadian health care. *CMAJ* 2004 Feb 3;170(3):353-4.
- (2) Zhan C, Kelley E, Yang HP et al. Assessing patient safety in the United States: challenges and opportunities. *Med Care* 2005 Mar;43(3 Suppl):42-7.
- (3) Zhan C, Miller MR. Administrative data based patient safety research: a critical review. *Qual Saf Health Care* 2003 Dec;12 Suppl 2:58-63.
- (4) Agency for Healthcare Research and Quality. Patient Safety Indicators: Technical Specifications (version 4.2). <http://www.qualityindicators.ahrq.gov>
- (5) Drosler SE, Klazinga NS, Romano PS et al. Application of patient safety indicators internationally: a pilot study among seven countries. *Int J Qual Health Care* 2009 Aug;21(4):272-8.
- (6) Drosler SE, Romano PS, Tancredi DJ, et al. International comparability of patient safety indicators in 15 OECD member countries: a methodological approach of adjustment by secondary diagnoses. *Health Serv Res* 2012 Feb;47(1 Pt 1):275-92.
- (7) Jette N, Quan H, Hemmelgarn B et al. The Development, evolution, and modifications of ICD-10: Challenges to the international comparability of morbidity data. *Med Care* 2010 Dec;48(12):1105-10.
- (8) Canadian Institute for Health Information. Canadian Coding Standards for ICD-10-CA and CCI. [http://secure.cihi.ca/cihiweb/dispPage.jsp?cw\\_page=RC\\_382\\_E](http://secure.cihi.ca/cihiweb/dispPage.jsp?cw_page=RC_382_E)
- (9) Quan H, Drösler S, Sundararajan V et al. Adaptation of AHRQ Patient Safety Indicators for Use in ICD-10 Administrative Data by an International Consortium. *Advances in Patient Safety: New Directions and Alternative Approaches* 2013 Jan 3.
- (10) Zhou X, Obuchowski N, McClish D. *Statistical methods in diagnostic medicine*. 2 ed. New Jersey: John Wiley & Sons; 2011.
- (11) AHRQ. AHRQ quality indicators validation pilot. <http://qualityindicators.ahrq.gov/validationpilot.htm>
- (12) White RH, Sadeghi B, Tancredi DJ et al. How valid is the ICD-9-CM based AHRQ patient safety indicator for postoperative venous thromboembolism? *Med Care* 2009 Dec;47(12):1237-43.
- (13) Henderson KE, Recktenwald A, Reichley RM et al. Clinical validation of the AHRQ postoperative venous thromboembolism patient safety indicator. *Jt Comm J Qual Patient Saf* 2009 Jul;35(7):370-6.



- 1  
2  
3 (14) Zhan C, Battles J, Chiang YP, et al. The validity of ICD-9-CM codes in identifying  
4 postoperative deep vein thrombosis and pulmonary embolism. *Jt Comm J Qual Patient*  
5 *Saf* 2007 Jun;33(6):326-31.  
6  
7
- 8 (15) Romano PS, Mull HJ, Rivard PE et al. Validity of selected AHRQ patient safety  
9 indicators based on VA National Surgical Quality Improvement Program data. *Health*  
10 *Serv Res* 2009 Feb;44(1):182-204.  
11
- 12 (16) Kaafarani HM, Borzecki AM, Itani KM et al. Validity of selected patient safety  
13 indicators: opportunities and concerns. *J Am Coll Surg* 2011 Jun;212(6):924-34.  
14
- 15 (17) Utter GH, Zrelak PA, Baron R et al. Positive predictive value of the AHRQ accidental  
16 puncture or laceration patient safety indicator. *Ann Surg* 2009 Dec;250(6):1041-5.  
17
- 18 (18) Koch CG, Li L, Hixson E, et al. What are the real rates of postoperative complications:  
19 elucidating inconsistencies between administrative and clinical data sources. *J Am Coll*  
20 *Surg* 2012 May;214(5):798-805.  
21
- 22 (19) Hennessy DA, Quan H, Faris P, et al. Do coder characteristics influence validity of ICD-  
23 10 hospital discharge data? *BMC Health Serv Res* 2010;10:99.  
24
- 25 (20) So L, Beck CA, Brien S et al. Chart documentation quality and its relationship to the  
26 validity of administrative data discharge records. *Health Informatics J* 2010;16(2):101-  
27 13.  
28
- 29 (21) Quan H, Li B, Saunders LD et al. Assessing validity of ICD-9-CM and ICD-10  
30 administrative data in recording clinical conditions in a unique dually coded database.  
31 *Health Serv Res* 2008 Aug;43(4):1424-41.  
32
- 33 (22) Walker RL, Hennessy DA, Johansen H, et al. Implementation of ICD-10 in Canada: how  
34 has it impacted coded hospital discharge data? *BMC Health Serv Res* 2012;12:149.  
35
- 36 (23) Januel JM, Luthi JC, Quan H et al. Improved accuracy of co-morbidity coding over time  
37 after the introduction of ICD-10 administrative data. *BMC Health Serv Res* 2011;11:194.  
38  
39  
40  
41  
42  
43  
44  
45  
46  
47  
48  
49  
50  
51  
52  
53  
54  
55  
56  
57  
58  
59  
60

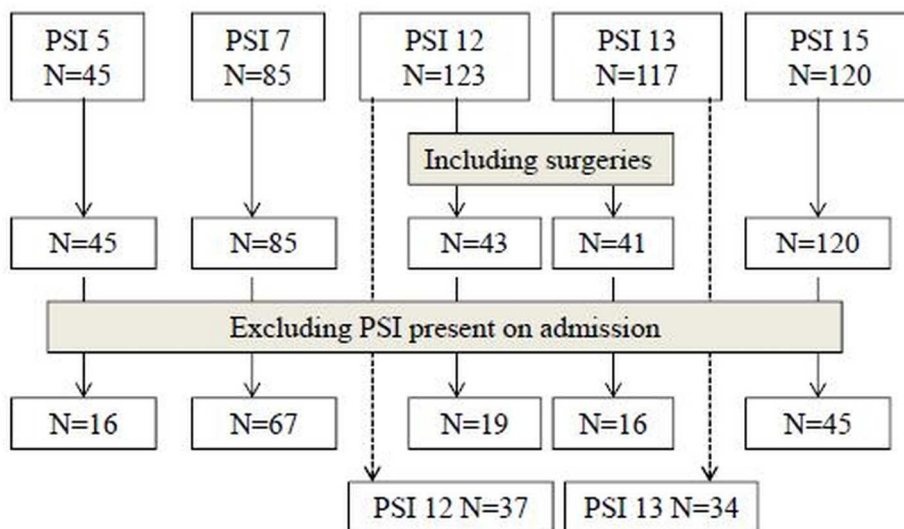

Figure 1: Sample Size by Patient Safety Indicator (PSI)

117x90mm (300 x 300 DPI)

view only

Appendix 1. Validation studies of Agency for Healthcare Research and Quality (AHRQ) patient safety indicator (PSI)

| Validated PSI and author                                                           | Reference standard, Year of data Country | PPV ( % of N) | Conclusion made by authors                                                                                                                                                                                                                    |
|------------------------------------------------------------------------------------|------------------------------------------|---------------|-----------------------------------------------------------------------------------------------------------------------------------------------------------------------------------------------------------------------------------------------|
| PSI 3: Decubitus ulcer<br>Polancich et al.(1)                                      | Chart review<br>Year 2005<br>US          | 27.1% of 118  | “Administrative data, when used alone, are not sufficient in measuring the true rate of hospital-acquired decubitus ulcers.”                                                                                                                  |
| PSI 4: Failure to rescue<br>Hortitz et al.(2)                                      | Chart review,<br>2004, US                | 50.7% of 2354 | “This indicator may be useful internally to flag possible cases of quality failure but has limitations for external institutional comparisons.”                                                                                               |
| PSI 5: Foreign body left during procedure,<br>Chen et al.(3)                       | Chart review,<br>2003-07, US             | 45% of 93     | "The reported rate of foreign body events as detected by PSI 5 is low in the VA, but occurs in both surgical and medical procedures."                                                                                                         |
| PSI 6: Iatrogenic Pneumothorax<br>Sadeghi et al.(4)                                | Chart review<br>Year 2006-07<br>US       | 78% of 200    | “AHRQ’s iatrogenic pneumothorax indicator can serve in quality of care improvement.”                                                                                                                                                          |
| PSI 7: Infection due to medical care, Zrelak et al. (5)                            | Chart review,<br>2005-07, US             | 54% of 191    | "PSI 7 has a low positive predictive value compared with other PSIs recently studied. Present on admission diagnoses and improved coding for infections related to central venous catheters (implemented October 2007) may improve validity." |
| PSI 7: Central venous catheter-related bloodstream infections, Cevasco et al.(6)   | Chart review,<br>2003-07, US             | 45% of 112    | "As it currently stands, PSI 7 should not be used as a pay-for-performance measure, but should be limited to use in internal quality improvement efforts."                                                                                    |
| PSI 10: Postoperative physiologic and metabolic derangement<br>Borsecki et al. (7) | Chart review,<br>2002-07<br>US           | 63% of 119    | "Due to its low PPV, we recommend removing diabetes complications from the indicator and focusing on AKI."                                                                                                                                    |

| Validated PSI and author                                                                 | Reference standard, Year of data Country | PPV ( % of N)                                       | Conclusion made by authors                                                                                                                                                                                        |
|------------------------------------------------------------------------------------------|------------------------------------------|-----------------------------------------------------|-------------------------------------------------------------------------------------------------------------------------------------------------------------------------------------------------------------------|
| PSI 11: Respiratory failure<br>Utter et al.(8)                                           | Chart review, 2007<br>US                 | 83% of 609                                          | “A hospitalization flagged by PSI 11 is reasonably likely to represent a true postoperative pulmonary complication.”                                                                                              |
| PSI 11: Respiratory failure<br>Borzecki et al.(9)                                        | Chart review<br>Year 2003-07<br>US       | 67% of 112                                          | “PRF should continue to be used as a screen for potential patient-safety events. Its PPV could be substantially improved in the Veterans Health Administration through introduction of an admission status code.” |
| PSI 12: Postoperative venous Thromboembolism and pulmonary embolism,<br>White et al.(10) | Chart review, 2005-07,<br>US             | 79% of 573<br>44% of 452,<br>for lower<br>extremity | “Current PSI 12 criteria do not accurately identify patients with acute postoperative lower extremity DVT or PE.”                                                                                                 |
| PSI 12: Venous thromboembolism and pulmonary embolism,<br>Zhan et al.(11)                | Chart review, 2002-04, US                | 29% of 327                                          | “ICD-9-CM codes in Medicare claims are sensitive but have limited predictive validity in identifying postoperative DVT/PE.”                                                                                       |
| PSI 12: Venous thromboembolism and pulmonary embolism,<br>Henderson et al.(12)           | Chart review, 2004, US                   | 54.5% of 112                                        | “The VTE PSI performed well as a screening tool but generated a significant number of false-positive cases, a problem that could be substantially reduced with improved coding methods.”                          |
| PSI 13: Postoperative sepsis, Cevasco et al.(13)                                         | Chart review, 2005-07                    | 53% of 112<br>41% of 164                            | "As it currently stands, the use of PSI 13 as a stand-alone measure for hospital reporting appears premature"                                                                                                     |
| PSI 14: Postoperative wound dehiscence,<br>Cevasco et al.(14)                            | Chart review, 2003-07, US                | 87% of 112                                          | "This PSI is a promising measure for both quality improvement and performance measurement"                                                                                                                        |
| PSI 15: Accidental puncture or laceration                                                | Chart review<br>Year 2005-07             | 91% of 249                                          | “Although PSI 15 is highly predictive of APL from a coding perspective, the                                                                                                                                       |

| Validated PSI and author                                                                                                                                                                                                                                                     | Reference standard, Year of data Country | PPV ( % of N)                                                                                            | Conclusion made by authors                                                                                                                                                                                                                                                                                               |
|------------------------------------------------------------------------------------------------------------------------------------------------------------------------------------------------------------------------------------------------------------------------------|------------------------------------------|----------------------------------------------------------------------------------------------------------|--------------------------------------------------------------------------------------------------------------------------------------------------------------------------------------------------------------------------------------------------------------------------------------------------------------------------|
| Utter et al.(15)                                                                                                                                                                                                                                                             | US                                       |                                                                                                          | indicator is less predictive of APL that could be considered clinically important."                                                                                                                                                                                                                                      |
| PSI 18 and 19:<br>Obstetric trauma 3 <sup>rd</sup> or 4 <sup>th</sup> degree of perineal laceration<br>Romano et al.(16)                                                                                                                                                     | Chart review<br>Year 1992-93<br>US       | 90% of 62                                                                                                | "Third- and fourth-degree perineal lacerations are accurately reported on hospital discharge abstracts."                                                                                                                                                                                                                 |
| PSI 18 and 19:<br>Obstetric trauma 3 <sup>rd</sup> or 4 <sup>th</sup> degree of perineal laceration,<br>Brubaker et al.(17)                                                                                                                                                  | Chart review<br>Year 2002-04<br>US       | 76.6% of 383                                                                                             | "Discharge coding errors are common after delivery-associated anal sphincter laceration, with omitted codes representing the largest source of errors."                                                                                                                                                                  |
| PSI 19: Postoperative hemorrhage or hematoma<br>Borzecki et al.(18)                                                                                                                                                                                                          | Chart review,<br>2003-07, US             | 75% of 112                                                                                               | "PHH's accuracy could be improved by coding enhancements, such as adopting present on admission codes or associating a timing factor with codes dealing with bleeding control. "                                                                                                                                         |
| PSI 10: Postoperative physiologic and metabolic derangements<br>PSI 11: Postoperative respiratory failure<br>PSI 12: Postoperative pulmonary embolism or deep vein thrombosis<br>PSI 13: Postoperative sepsis<br>PSI 14: Postoperative wound dehiscence<br>Romano et al.(19) | Chart data<br>Year 2001<br>US            | PSI 10: 63% of 62<br>PSI 11: 68% of 344<br>PSI 12: 22% of 241<br>PSI 13: 45% of 32<br>PSI 14: 72% of 274 | "PSI sensitivities and PPVs were moderate. For three of the five PSIs, AHRQ has incorporated our alternative, higher sensitivity definitions into current PSI algorithms. Further validation should be considered before most of the PSIs evaluated herein are used to publicly compare or reward hospital performance." |
| PSI 6: Iatrogenic pneumothorax<br>PSI 12: Postoperative                                                                                                                                                                                                                      | Chart review<br>Year 2003-07<br>US       | PSI 6: 73% of 112<br>PSI 12: 45%                                                                         | "Until coding revisions are implemented, these PSIs, especially pPE/DVT, should be used primarily                                                                                                                                                                                                                        |

| Validated PSI and author                                                                                                                                                                                                                                                                                                                                                                                                                                                                                                                                                               | Reference standard, Year of data Country | PPV ( % of N)                                                                                                                                                                                                                                                | Conclusion made by authors                                                                                                                                                                                                                                                                                  |
|----------------------------------------------------------------------------------------------------------------------------------------------------------------------------------------------------------------------------------------------------------------------------------------------------------------------------------------------------------------------------------------------------------------------------------------------------------------------------------------------------------------------------------------------------------------------------------------|------------------------------------------|--------------------------------------------------------------------------------------------------------------------------------------------------------------------------------------------------------------------------------------------------------------|-------------------------------------------------------------------------------------------------------------------------------------------------------------------------------------------------------------------------------------------------------------------------------------------------------------|
| pulmonary embolus and deep vein thrombosis<br>PSI 15: Accidental puncture and laceration<br>Kaafarani et al.(20)                                                                                                                                                                                                                                                                                                                                                                                                                                                                       |                                          | of 112<br>PSI 15: 85%<br>of 112                                                                                                                                                                                                                              | for screening and case-finding. Their utility for public reporting and pay-for-performance needs to be reassessed."                                                                                                                                                                                         |
| PSI 3: Decubitus ulcer<br>PSI 5: Foreign body left during procedure<br>PSI 6: Iatrogenic pneumothorax<br>PSI 7: Central venous catheter-related bloodstream infections<br>PSI 8: Postoperative hip fracture<br>PSI 9: Postoperative hemorrhage or hematoma<br>PSI 10: Postoperative physiologic and metabolic derangements<br>PSI 11: Postoperative respiratory failure<br>PSI 12: Postoperative pulmonary embolism or deep vein thrombosis<br>PSI 13: Postoperative sepsis<br>PSI 14: Postoperative wound dehiscence<br>PSI 15: accidental puncture or laceration<br>Rosen et al.(21) | Chart review<br>Year 2003-07<br>US       | PSI 3: 30% of 112<br>PSI 5: 93% of 46<br>PSI 6: 73% of 112<br>PSI 7: 38% of 112<br>PSI 8: 28% of 46<br>PSI 9: 75% of 112<br>PSI 10: 63% of 119<br>PSI 11: 67% of 112<br>PSI 12: 43% of 112<br>PSI 13: 53% of 112<br>PSI 14: 87% of 112<br>PSI 15: 85% of 112 | "Overall, PPVs were moderate for most of the PSIs. Implementing POA codes and using more specific ICD-9-CM codes would improve their validity. Our results suggest that additional coding improvements are needed before the PSIs evaluated herein are used for hospital reporting or pay for performance." |
| PSI 9: Postoperative hemorrhage or                                                                                                                                                                                                                                                                                                                                                                                                                                                                                                                                                     | National Surgical                        | Kappa:<br>NSQIP vs.                                                                                                                                                                                                                                          | "The main contributor was difference in definitions, with additional                                                                                                                                                                                                                                        |

| Validated PSI and author                                                                                                                                                     | Reference standard, Year of data Country                                                                | PPV ( % of N)                                                                                                                                                      | Conclusion made by authors                                                                                                                                                                                                                                                                                           |
|------------------------------------------------------------------------------------------------------------------------------------------------------------------------------|---------------------------------------------------------------------------------------------------------|--------------------------------------------------------------------------------------------------------------------------------------------------------------------|----------------------------------------------------------------------------------------------------------------------------------------------------------------------------------------------------------------------------------------------------------------------------------------------------------------------|
| hematoma<br>PSI 11: Postoperative respiratory failure<br>PSI 12: Postoperative pulmonary embolism or deep vein thrombosis<br>PSI 13: Postoperative sepsis<br>Koch et al.(22) | Quality Improvement program (NSQIP)<br>Cardiovascular Information Registry (CVIR)<br>Year 2009-10<br>US | AHRQ, 4583<br>PSI 9: 0.14<br>PSI 11: 0.30<br>PSI 12: 0.60<br>PSI 13: 0.07<br>CVIR vs.<br>AHRQ, 7897<br>PSI 9: 0.08<br>PSI 11: 0.02<br>PSI 12: 0.55<br>PSI 13: 0.16 | contribution from data collection and management methods. Although any of these sources can be used for their original intent of performance improvement, this study emphasizes the shortcomings of using these sources for grading performance without standardizing definitions, data collection, and management." |



## Appendix 2. ICD-10 diagnosis codes for AHRQ patient safety indicator (PSI)

| Code                                        | Description                                                                                                                      |
|---------------------------------------------|----------------------------------------------------------------------------------------------------------------------------------|
| Foreign body left in during procedure       |                                                                                                                                  |
| T815                                        | Foreign body accidentally left in body cavity or operation wound following a procedure                                           |
| T816                                        | Acute reaction to foreign substance accidentally left during a procedure                                                         |
| Y610                                        | Foreign object accidentally left in body during surgical and medical care: During surgical operation                             |
| Y611                                        | Foreign object accidentally left in body during surgical and medical care: During infusion or transfusion                        |
| Y612                                        | Foreign object accidentally left in body during surgical and medical care: During kidney dialysis or other perfusion             |
| Y613                                        | Foreign object accidentally left in body during surgical and medical care: During injection or immunization                      |
| Y614                                        | Foreign object accidentally left in body during surgical and medical care: During endoscopic examination                         |
| Y615                                        | Foreign object accidentally left in body during surgical and medical care: During heart catheterization                          |
| Y616                                        | Foreign object accidentally left in body during surgical and medical care: During aspiration, puncture and other catheterization |
| Y617                                        | Foreign object accidentally left in body during surgical and medical care: During removal of catheter or packing                 |
| Y618                                        | Foreign object accidentally left in body during surgical and medical care: During other surgical and medical care                |
| Y619                                        | Foreign object accidentally left in body during surgical and medical care: During unspecified surgical and medical care          |
| Infections due to medical care              |                                                                                                                                  |
| T80.2                                       | Infections following infusion, transfusion and therapeutic injection                                                             |
| T82.7                                       | Infection and inflammatory reaction due to other cardiac and vascular devices, implants and grafts                               |
| T88.0                                       | Infection following immunization                                                                                                 |
| Pulmonary embolism and deep vein thrombosis |                                                                                                                                  |
| I26.0                                       | Pulmonary embolism with mention of acute cor pulmonale                                                                           |
| I26.9                                       | Pulmonary embolism without mention of acute cor pulmonale                                                                        |
| I80.1                                       | Phlebitis and thrombophlebitis of femoral vein                                                                                   |



| <b>Code</b> | <b>Description</b>                                                        |
|-------------|---------------------------------------------------------------------------|
| I80.2       | Phlebitis and thrombophlebitis of other deep vessels of lower extremities |
| I80.3       | Phlebitis and thrombophlebitis of lower extremities, unspecified          |
| I80.8       | Phlebitis and thrombophlebitis of other sites                             |
| I80.9       | Phlebitis and thrombophlebitis of unspecified site                        |
| I82.8       | Embolism and thrombosis of other specified veins                          |
| I82.9       | Embolism and thrombosis of unspecified vein                               |
| Sepsis      |                                                                           |
| A400        | Septicaemia due to streptococcus, group A                                 |
| A401        | Septicaemia due to streptococcus, group B                                 |
| A402        | Septicaemia due to streptococcus, group D                                 |
| A403        | Septicaemia due to Streptococcus pneumoniae                               |
| A408        | Other streptococcal septicaemia                                           |
| A409        | Streptococcal septicaemia, unspecified                                    |
| A410        | Septicaemia due to Staphylococcus aureus                                  |
| A411        | Septicaemia due to other specified staphylococcus                         |
| A412        | Septicaemia due to unspecified staphylococcus                             |
| A413        | Septicaemia due to Haemophilus influenzae                                 |
| A414        | Septicaemia due to anaerobes                                              |
| A415        | Septicaemia due to other Gram-negative organisms                          |
| A418        | Other specified septicaemia                                               |
| A419        | Septicaemia, unspecified                                                  |
| R578        | Other shock                                                               |
| T811        | Shock during or resulting from a procedure, not elsewhere classified      |

Accidental cut, puncture, perforation, or hemorrhage during medical care

| Code | Description                                                                                                                                     |
|------|-------------------------------------------------------------------------------------------------------------------------------------------------|
| T812 | Accidental puncture and laceration during a procedure, not elsewhere classified                                                                 |
| Y600 | Unintentional cut, puncture, perforation or haemorrhage during surgical and medical care: During surgical operation                             |
| Y601 | Unintentional cut, puncture, perforation or haemorrhage during surgical and medical care: During infusion or transfusion                        |
| Y602 | Unintentional cut, puncture, perforation or haemorrhage during surgical and medical care: During kidney dialysis or other perfusion             |
| Y603 | Unintentional cut, puncture, perforation or haemorrhage during surgical and medical care: During injection or immunization                      |
| Y604 | Unintentional cut, puncture, perforation or haemorrhage during surgical and medical care: During endoscopic examination                         |
| Y605 | Unintentional cut, puncture, perforation or haemorrhage during surgical and medical care: During heart catheterization                          |
| Y606 | Unintentional cut, puncture, perforation or haemorrhage during surgical and medical care: During aspiration, puncture and other catheterization |
| Y607 | Unintentional cut, puncture, perforation or haemorrhage during surgical and medical care: During administration of enema                        |
| Y608 | Unintentional cut, puncture, perforation or haemorrhage during surgical and medical care: During other surgical and medical care                |
| Y609 | Unintentional cut, puncture, perforation or haemorrhage during surgical and medical care: During unspecified surgical and medical care          |

#### References

- (1) Polancich S, Restrepo E, Prosser J. Cautious use of administrative data for decubitus ulcer outcome reporting. *Am J Med Qual* 2006 Jul;21(4):262-8.
- (2) Horwitz LI, Cuny JF, Cerese J, Krumholz HM. Failure to rescue: validation of an algorithm using administrative data. *Med Care* 2007 Apr;45(4):283-7.
- (3) Chen Q, Rosen AK, Cevasco M, Shin M, Itani KM, Borzecki AM. Detecting patient safety indicators: How valid is "foreign body left during procedure" in the Veterans Health Administration? *J Am Coll Surg* 2011 Jun;212(6):977-83.

- 1  
2  
3 (4) Sadeghi B, Baron R, Zrelak P *et al.* Cases of iatrogenic pneumothorax can be identified  
4 from ICD-9-CM coded data. *Am J Med Qual* 2010 May;25(3):218-24.  
5
- 6  
7 (5) Zrelak PA, Sadeghi B, Utter GH *et al.* Positive predictive value of the Agency for  
8 Healthcare Research and Quality Patient Safety Indicator for central line-related  
9 bloodstream infection ("selected infections due to medical care"). *J Healthc Qual* 2011  
10 Mar;33(2):29-36.  
11
- 12 (6) Cevasco M, Borzecki AM, O'Brien WJ *et al.* Validity of the AHRQ Patient Safety  
13 Indicator "central venous catheter-related bloodstream infections". *J Am Coll Surg* 2011  
14 Jun;212(6):984-90.  
15
- 16 (7) Borzecki AM, Cevasco M, Chen Q, Shin M, Itani KM, Rosen AK. How valid is the  
17 AHRQ Patient Safety Indicator "postoperative physiologic and metabolic derangement"?  
18 *J Am Coll Surg* 2011 Jun;212(6):968-76.  
19
- 20 (8) Utter GH, Cuny J, Sama P *et al.* Detection of postoperative respiratory failure: how  
21 predictive is the Agency for Healthcare Research and Quality's Patient Safety Indicator? *J*  
22 *Am Coll Surg* 2010 Sep;211(3):347-54.  
23
- 24 (9) Borzecki AM, Kaafarani HM, Utter GH *et al.* How valid is the AHRQ Patient Safety  
25 Indicator "postoperative respiratory failure"? *J Am Coll Surg* 2011 Jun;212(6):935-45.  
26
- 27 (10) White RH, Sadeghi B, Tancredi DJ *et al.* How valid is the ICD-9-CM based AHRQ  
28 patient safety indicator for postoperative venous thromboembolism? *Med Care* 2009  
29 Dec;47(12):1237-43.  
30
- 31 (11) Zhan C, Battles J, Chiang YP, Hunt D. The validity of ICD-9-CM codes in identifying  
32 postoperative deep vein thrombosis and pulmonary embolism. *Jt Comm J Qual Patient*  
33 *Saf* 2007 Jun;33(6):326-31.  
34
- 35 (12) Henderson KE, Recktenwald A, Reichley RM *et al.* Clinical validation of the AHRQ  
36 postoperative venous thromboembolism patient safety indicator. *Jt Comm J Qual Patient*  
37 *Saf* 2009 Jul;35(7):370-6.  
38
- 39 (13) Cevasco M, Borzecki AM, Chen Q *et al.* Positive predictive value of the AHRQ Patient  
40 Safety Indicator "Postoperative Sepsis": implications for practice and policy. *J Am Coll*  
41 *Surg* 2011 Jun;212(6):954-61.  
42
- 43 (14) Cevasco M, Borzecki AM, McClusky DA, III *et al.* Positive predictive value of the  
44 AHRQ Patient Safety Indicator "postoperative wound dehiscence". *J Am Coll Surg* 2011  
45 Jun;212(6):962-7.  
46
- 47 (15) Utter GH, Zrelak PA, Baron R *et al.* Positive predictive value of the AHRQ accidental  
48 puncture or laceration patient safety indicator. *Ann Surg* 2009 Dec;250(6):1041-5.  
49  
50  
51  
52  
53  
54  
55  
56  
57  
58  
59  
60

- 1  
2  
3  
4  
5  
6  
7  
8  
9  
10  
11  
12  
13  
14  
15  
16  
17  
18  
19  
20  
21  
22  
23  
24  
25  
26  
27  
28  
29  
30  
31  
32  
33  
34  
35  
36  
37  
38  
39  
40  
41  
42  
43  
44  
45  
46  
47  
48  
49  
50  
51  
52  
53  
54  
55  
56  
57  
58  
59  
60
- (16) Romano PS, Yasmeen S, Schembri ME, Keyzer JM, Gilbert WM. Coding of perineal lacerations and other complications of obstetric care in hospital discharge data. *Obstet Gynecol* 2005 Oct;106(4):717-25.
  - (17) Brubaker L, Bradley CS, Handa VL *et al.* Anal sphincter laceration at vaginal delivery: is this event coded accurately? *Obstet Gynecol* 2007 May;109(5):1141-5.
  - (18) Borzecki AM, Kaafarani H, Cevasco M *et al.* How valid is the AHRQ Patient Safety Indicator "postoperative hemorrhage or hematoma"? *J Am Coll Surg* 2011 Jun;212(6):946-53.
  - (19) Romano PS, Mull HJ, Rivard PE *et al.* Validity of selected AHRQ patient safety indicators based on VA National Surgical Quality Improvement Program data. *Health Serv Res* 2009 Feb;44(1):182-204.
  - (20) Kaafarani HM, Borzecki AM, Itani KM *et al.* Validity of selected patient safety indicators: opportunities and concerns. *J Am Coll Surg* 2011 Jun;212(6):924-34.
  - (21) Rosen AK, Itani KM, Cevasco M *et al.* Validating the patient safety indicators in the Veterans Health Administration: do they accurately identify true safety events? *Med Care* 2012 Jan;50(1):74-85.
  - (22) Koch CG, Li L, Hixson E, Tang A, Phillips S, Henderson JM. What are the real rates of postoperative complications: elucidating inconsistencies between administrative and clinical data sources. *J Am Coll Surg* 2012 May;214(5):798-805.

1  
2  
3 **Title: Validity of AHRQ Patient Safety Indicators Derived from ICD-10 Hospital**  
4  
5 **Discharge Abstract Data (Chart Review Study)**  
6  
7

8 Running header: Validating Patient Safety Indicators in ICD-10 Data  
9

10  
11 Hude Quan MD PhD<sup>1\*</sup>, Cathy Eastwood, MN<sup>2</sup>, Ceara Tess Cunningham MA<sup>1</sup>, Mingfu Liu<sup>3</sup> PhD,  
12  
13 Ward Flemons MD<sup>4</sup>, Carolyn De Coster PhD<sup>1,3</sup>, William A Ghali MD MPH<sup>1,4</sup> for the IMECCHI  
14  
15 investigators  
16  
17

18  
19 \*Correspondence:  
20

21 Hude Quan  
22

23  
24 Department of Community Health Sciences  
25

26 University of Calgary  
27

28  
29 3280 Hospital Dr. NW, Calgary, Alberta, Canada, T2N 4Z6  
30

31 Telephone: (403) 210 8617  
32

33 Fax: (403) 210 3818  
34

35  
36 E-mail: [hquan@ucalgary.ca](mailto:hquan@ucalgary.ca)  
37  
38  
39

40  
41 <sup>1</sup> Department of Community Health Sciences, University of Calgary, Canada  
42

43  
44 <sup>2</sup> Faculty of Nursing, University of Calgary, Canada  
45

46  
47 <sup>3</sup> Alberta Health Services, Alberta, Canada  
48

49  
50 <sup>4</sup> Department of Medicine, University of Calgary, Canada  
51

52 Key words: ICD-10, patient safety, outcome, administrative data  
53

54 Word count: 2,954; Tables: 3, Figure: 1, Supplementary Material: Appendix: 1 and 2 for on-line  
55  
56  
57  
58  
59  
60

## ABSTRACT

Objective: To assess if AHRQ PSIs could be used for case-findings in International Classification of Disease (ICD)-10 hospital discharge abstract data.

Design: We identified and randomly selected 490 patients with foreign body left during a procedure (PSI 5-foreign body), selected infections (IV site) due to medical care (PSI 7-infection), post-operative pulmonary embolism or deep vein thrombosis (PSI 12-PE/DVT), post-operative sepsis (PSI 13-sepsis), and accidental puncture or laceration (PSI 15-laceration) among patients discharged from three adult acute care hospitals in Calgary, Canada in 2007 and 2008. Their charts were reviewed for determining presence of PSIs and used as the reference standard, PPV statistics were calculated to determine the proportion of positives in the administrative data was 'true positives'.

Results: The PPV for PSI 5-foreign body was 62.5% (95% confidence interval: 35.4% - 84.8%), PSI 7-infection was 79.1% (67.4% - 88.1%), PSI 12-PE/DVT was 89.5% (66.9% - 98.7), PSI 13-sepsis was 12.5% (1.6% - 38.4%) and PSI 15-laceration was 86.4% (75.0% - 94.0%) after excluding those who presented to the hospital with the condition.

Conclusions: Several PSIs had high PPV in ICD administrative data and are thus powerful tools for true positive case-finding. The tools could be used to identify potential cases from large volume of admissions for verification through chart review. In contrast, their sensitivity has not been well-characterized and users of PSIs should be cautious if using these for 'quality of care reporting' presenting rate of PSIs because under-coded data would generate falsely low PSI rates.

Key words: ICD-10, patient safety, outcome, administrative data

## INTRODUCTION

Patient safety is a critical component of health care quality. Assessments of patient safety are traditionally done through chart review, survey and voluntary reporting of adverse events and medical errors (1;2). These data collection methods focus on a specific type of event, collect data from non-random and biased populations, cover limited geographic areas, or are too labor-intensive for widespread use. Therefore, researchers have paid great attention to routinely collected hospital discharge abstract administrative data for population-based studies of adverse events(3). Therefore, the Agency for Healthcare Research and Quality (AHRQ) conducted pioneering work to develop patient safety indicators for use with the International Classification of Disease, 9<sup>th</sup> version, Clinical Modification (ICD-9-CM) administrative data, which cover large geographic areas and are readily available and relatively inexpensive to use.

AHRQ PSIs were developed through a literature search, review of ICD-9-CM manuals, consultation with physician panels, and empirical data analyses. Over 200 ICD-9-CM codes representing potential patient safety problems were identified and 48 indicators were labeled as the most promising PSIs by the AHRQ research team. Of these, 20 hospital-level and 7 area-level PSIs were recommended by one or more multi-specialty panels as a set of ‘accepted’ indicators(4). To facilitate utilization of PSIs, AHRQ developed and distributed (at no cost) SAS and SPSS software tools. The PSIs can be used to help hospitals identify potential adverse events that might need further study and also provide an opportunity to assess the occurrence of adverse events and in-hospital complications using routinely collected administrative data.

The AHRQ PSIs have been broadly used to assess the occurrence of adverse events and in-hospital complications by many international and national agencies, including Organization for Economic Cooperation and Development. Drosler et al.(5;6) analyzed hospital discharge

1  
2  
3 abstract administrative data from multiple countries and found that PSI rates varied across  
4  
5 countries. The variation in the PSI estimate could be caused by true quality of care differences  
6  
7 or by differences in data quality.  
8  
9

10 Administrative data has possible limitations for identifying complications that represent  
11  
12 medical error or may be at least in some way preventable. (4) First, administrative data are  
13  
14 unlikely to capture all cases of a complication, regardless of the preventability, without false  
15  
16 positives and false negatives. Second, when the ICD codes are accurate in defining an event, the  
17  
18 clinical vagueness inherent in the description of the code itself may lead to a highly  
19  
20 heterogeneous pool of clinical states represented by that code. Third, incomplete reporting may  
21  
22 compromise the accuracy of any data source used for identifying patient safety problems, as  
23  
24 medical providers might fear adverse consequences of “full disclosure” in potentially public  
25  
26 records such as discharge abstracts. Fourth, the ability of these data to distinguish events in  
27  
28 which no error occurred from true medical errors is uncertain.  
29  
30  
31  
32  
33

34 Data quality is commonly evaluated using four statistical parameters. Sensitivity is a  
35  
36 measure of the accuracy of recording presence of PSIs in administrative data when these are  
37  
38 truly present according to reference data (i.e. gold standard). Specificity is to determine the  
39  
40 accuracy of reporting absence of these PSIs in the administrative data when these PSIs are absent  
41  
42 in the reference data. Positive predictive value (PPV) and negative predictive value (NPV) are to  
43  
44 determine the extent to which PSIs present in the administrative data are also present in the  
45  
46 reference data or the extent to which a condition absent in the administrative data are truly absent  
47  
48 according to the reference data.  
49  
50  
51  
52  
53  
54  
55  
56  
57  
58  
59  
60



1  
2  
3  
4  
5  
6  
7  
8  
9  
10  
11  
12  
13  
14  
15  
16  
17  
18  
19  
20  
21  
22  
23  
24  
25  
26  
27  
28  
29  
30  
31  
32  
33  
34  
35  
36  
37  
38  
39  
40  
41  
42  
43  
44  
45  
46  
47  
48  
49  
50  
51  
52  
53  
54  
55  
56  
57  
58  
59  
60

PSIs could be used for case-finding or/and quality of care reporting. When PSIs are used for case-finding and PPV is low, chart review or investigation is required to verify the true case status after identification of cases from the administrative data. When PSIs are used to generate 'quality of care report' presenting rates, all of these four statistical parameters of validity (i.e. sensitivity, specificity, NPV and PPV) should be high.

PSIs have been validated using chart data as 'gold standard' or 'reference' in the USA ICD-9-CM data only (see Appendix 1). Many countries have employed ICD-10 for coding hospital discharge abstract data(7). However, the validity of PSIs in ICD-10 data has not been studied. Therefore, we conducted this study to estimate PPV or 'true positives' of PSIs derived from Canadian ICD-10 hospital discharge abstract data with flag of presence on admission using chart review as a reference standard.

## METHODS

### Identify patients at risk for each of 5 PSIs from ICD-10 data

Of the AHRQ PSIs, we assessed PPV for 5 PSIs, which are likely to have high PPVs based on literature (see Appendix 1), including foreign body left during procedure (PSI 5 - foreign body), selected infections (IV site) due to medical care (PSI 7 - infection), postoperative pulmonary embolism or deep vein thrombosis (PSI 12 - PE/DVT), postoperative sepsis (PSI 13 - sepsis), and accidental puncture or laceration (PSI 15 - laceration).

Our study sample was patients discharged in the years 2007 and 2008 from all three adult acute care hospitals in Calgary, Canada, a city with a population of just over one million. Professionally trained health records coders in Calgary code up to 50 diagnosis codes and 20 procedures for each patient using ICD-10-CA/CCI (Canadian ICD-10 and Canadian

1  
2  
3 Classification of Intervention)(8). One coordinator supervises and manages the coding practice at  
4  
5  
6 the three sites to establish a consistent approach to coding.

7  
8 We developed ICD-10 PSI algorithm(9) based on AHRQ ICD-9-CM PSI definition  
9  
10 manual as the blueprint (see ICD-10 codes in Appendix 2). PSIs in the data were defined using  
11  
12 the ICD-10 codes in the 49 secondary diagnosis coding fields. We included patients with those  
13  
14 ICD-10 codes. Earliest admission date was assigned to patients as the index date for those with  
15  
16 multiple admissions in the study period. Adverse events (e.g. pulmonary embolism) are likely  
17  
18 coded in the index admission as adverse events. Sometimes adverse events are not coded in the  
19  
20 index admission but could be coded as the most responsible diagnosis for a subsequent  
21  
22 admission. We missed these cases because timing of adverse event was not recorded for the  
23  
24 primary diagnosis. The indexed patients were stratified by the three hospitals and 50 patients  
25  
26 were randomly selected per hospital for each PSI when there were more than 50 patients  
27  
28 available. We aimed to review 40 patients at each hospital for each PSI, since at least 30 patients  
29  
30 should be reviewed for calculating PPV(10). Because PSI 5, foreign body left in during  
31  
32 procedure, occurs rarely, we expanded the observation period for this PSI to 2006-2009 to  
33  
34 increase the number of patients. However, we did not reach the target sample size for PSI 5 and 7.  
35  
36 An operating room procedure was defined using the code for inpatient procedure room type: '1'  
37  
38 for main operating room, '8' for cardiac catheterization laboratory or '9' for ambulatory care  
39  
40 operating room. Patients who underwent surgeries in the same day or emergency room were not  
41  
42 included because our administrative data does not capture these services.  
43  
44  
45  
46  
47  
48  
49

### 50 51 **Review charts to determine presence and absence of PSIs**

52  
53 Corresponding patient charts for the sampled patients were located using a combination  
54  
55 of the patient chart number and personal health number, which uniquely identifies each patient  
56  
57

1  
2  
3 and admission. Two chart reviewers underwent training and practice in the data extraction  
4  
5 process using the PSI data collection tools developed by AHRQ(11). In the training session, the  
6  
7 definition of study variables was discussed. Then the reviewers extracted data independently for  
8  
9 evidence of PSIs through an examination of the entire chart, including the cover page, discharge  
10  
11 summaries, pathology reports (including autopsy reports), trauma and resuscitation records,  
12  
13 admission notes, consultation reports, surgery/operative reports, anesthesia reports,  
14  
15 interdisciplinary progress notes, and physician daily progress notes. The reviewers followed the  
16  
17 AHRQ definitions to determine the presence or absence of the five PSIs, and specified whether  
18  
19 these events were present at the time of admission or arose during hospitalization. In the period  
20  
21 of data collection, they discussed cases with uncertainty in determining conditions to ensure the  
22  
23 consistency between them.  
24  
25  
26  
27  
28

### 29 **Statistical analysis**

30  
31 The ICD-10 administrative data and chart review data were linked and the linked data  
32  
33 were analyzed using statistical software of SAS 9.2. Study populations were characterized using  
34  
35 descriptive statistics. As mentioned above, we calculated PPV and its 95% confidence interval  
36  
37 for each PSI recorded in ICD-10 hospital discharge data accepting the chart review data as a  
38  
39 ‘reference standard’. PPV determines the extent to which a PSI present in the ICD-10 data was  
40  
41 also present in the chart review data. Unit of analysis is patient because one discharge abstract  
42  
43 record and chart was assigned to each patient. Ethics approval for this study was granted by the  
44  
45 Conjoint Health Research Ethics Board at the University in the city in which the study took place  
46  
47  
48  
49  
50  
51  
52 Extra or additional information on data is available by emailing the lead author HQ.

### 53 **RESULTS**

1  
2  
3 A total of 490 patients were included from ICD-10 hospital discharge abstract data. There  
4  
5 were 334 patients after excluding non-surgical patients for PSI 12 - EP/DVT and PSI 13 - sepsis  
6  
7 (see Figure 1) and 163 patients after excluding those with PSIs present on admission. We  
8  
9 reviewed all charts of 490 patients.  
10  
11

12  
13 Among 334 patients, the mean age ranged from 57.9 to 67.2 years across the 5 PSIs (see  
14  
15 Table 1). The proportion of male patients was lowest for PSI 13 - sepsis (36.6%) and highest for  
16  
17 PSI 7 -infection (55.3%). Patients with PSI 7-infection, 12-PE/DVT, or 13-sepsis stayed in  
18  
19 hospital 32.7, 41.3 and 43.9 days on average.  
20  
21

22  
23 Some countries do not code whether the condition was present at admission or arose  
24  
25 during the hospital stay. When conditions present on admission were included (see Table 2), the  
26  
27 PPV was 35.6% for PSI 5-foreign body, 70.6% for PSI 7-infection, 79.0% for PSI 12-PE/DVT,  
28  
29 9.8% for PSI 13-sepsis and 90.8% for PSI 15-laceration. When conditions present on admission  
30  
31 were excluded from the analysis, the PPV increased for PSI 5-foreign body (62.5%), 7-infection  
32  
33 (79.1%), 12-PE/DVT (89.5%) and 13-sepsis (12.5%) but decreased for PSI 15-laceration (from  
34  
35 90.8% to 86.4%).  
36  
37

38  
39 Considering some countries may not code procedures in administrative data, we  
40  
41 evaluated the PPV among 123 PSI 12-PE/DVT patients and 117 PSI 13-sepsis patients ignoring  
42  
43 surgical status. The PPV was 25.2% for PSI 12-PE/DVT, and 27.4% for PSI 13-sepsis. When  
44  
45 present on admission was considered, the PPV increased to 27.0% for PSI 12-PE/DVT, and  
46  
47 47.1% for PSI 13-sepsis. The reasons for misclassification of PSI conditions in administrative  
48  
49 data varied across PSIs (see Table 3). The most common reason was that the condition was  
50  
51 present on admission.  
52  
53  
54  
55  
56  
57  
58  
59  
60

## DISCUSSION

Like previous PSI validation studies in ICD-9-CM data, we focused on the PPV in ICD-10 administrative data as the foremost of interest. Our study revealed that PSI PPVs in most instances are sufficiently high to support widespread use for case findings. The low PPVs for some PSIs, such as sepsis do not support utility of the PSIs for quality of care reporting for comparisons across jurisdictions.

The validity of ICD-10 data varied by PSI. PSI 5-foreign body and 13-sepsis had low PPV but PSI 7-infection, 12-PE/DVT and 15-laceration had high PPV. The high PPV for PSI 12-PE/DVT (89.5%) is supported by one US study(12) (PPV=79%), but is higher than four other US studies (PPV=22-55%)(13-16). In contrast to our finding for PSI 13-sepsis (PPV=9.8%), Romano et al.(15) reported a higher PPV for PSI 13-sepsis (45%). As our finding PPV for PSI 15-laceration (PPV=90.8%), Kaafarani et al.(16) and Utter(17) et al. reported high PPV for PSI 15-laceration (91% and 85%, respectively).

Because low prevalence PSIs with reasonable precision (i.e. 95% confidence intervals) requires reviewing many charts for calculating sensitivity, all previous studies except for the study conducted by Koch et al.(18) evaluated data quality using PPV. The PPV value depends on prevalence and varies greatly across PSIs and studies. For example, the PPV for PSI 12-PE/DVT ranged from 22% to 79% across studies conducted in USA(12-16). Koch et al.(18) compared agreement between ICD-9-CM data, National Surgical Quality Improvement Program (NSQIP) and Cardiovascular Information Registry (CVIR) in PSIs. The agreement was substantial for PSI 12-PE/DVT and poor for PSI 9-hemorrhage, PSI 11-respiratory failure and PSI 13-sepsis. Sensitivity was very low, for example 0.13% for PSI 9-hemorrhage, 1.35% for PSI 11-

1  
2  
3 respiratory failure, 1.6% for PSI 12-PE/DVT and 0.13% for PSI 13-sepsis when ICD-9-CM and  
4  
5 NSQIP were compared.  
6  
7

8 Variation in validity across PSIs is determined by factors related to physicians (i.e., chart  
9 documentation), and coders (i.e., coding guidelines and coders' practice). Coders code medical  
10 events after discharge based on chart documentation. We used chart review as our reference  
11 standard; therefore, completeness of chart documentation could not be evaluated. Physicians  
12 might not document consequences of medical care in charts, leading to under-coding in hospital  
13 discharge abstracts. In addition, coders at hospitals are allotted a specific amount of time per  
14 chart on average, for example, 30 minutes in Alberta. Thus, they might focus on coding  
15 diagnoses and procedures that contribute significantly to length of stay such as PE/DVT, and  
16 ignore minor conditions such as infection or laboratory results that indicate sepsis, to follow  
17 Canada national coding guidelines. Our reviewers focused on determining the presence or  
18 absence of conditions based on all documented information in the chart, including diagnostic  
19 imaging and laboratory results. This is in contrast to general coding guidelines(8) that instruct  
20 coders to confine their coding to clinical problems, conditions, or circumstances that are  
21 identified in the record by the treating physicians as the clinically significant reason for the  
22 patient's admission, or that require or influence evaluation, treatment, management, or care.  
23 Coders do not typically code problems that do not meet these requirements, whereas the  
24 reviewers who conducted our 'reference standard' chart review included them regardless of the  
25 significance of the condition on resource use during hospitalization. Coders are instructed that  
26 when a condition is suggested by diagnostic test results, they should only code the condition if it  
27 has been confirmed by physician documentation. Our previous studies demonstrated that hospital  
28  
29  
30  
31  
32  
33  
34  
35  
36  
37  
38  
39  
40  
41  
42  
43  
44  
45  
46  
47  
48  
49  
50  
51  
52  
53  
54  
55  
56  
57  
58  
59  
60

1  
2  
3 discharge abstract data quality is not related to coders' employment status (full-time/part time  
4 and length of employment) but related to physician documentation quality(19;20).  
5  
6  
7

8 Excluding conditions present on admission improves PSI validity. For example, the PPV  
9 for PSI 12-PE/DVT increased from 79.0% to 89.5% from including to excluding the presence of  
10 the condition on admission. Canada has a long history of flagging timing of condition occurrence.  
11 Some US and Australian states currently have similar data elements in their discharge abstract  
12 data, and the US has recently begun coding the timing of conditions nation-wide. Timing of  
13 condition occurrence is not aimed at judging causal relationships between medical care and  
14 complications, just flagging whether the condition occurred or was diagnosed during the  
15 hospitalization. To capture complications, Japan has specified fields for coding complications in  
16 its hospital discharge data, in addition to diagnoses and procedures.  
17  
18  
19  
20  
21  
22  
23  
24  
25  
26  
27  
28

29 Could AHRQ PSIs derived from hospital discharge abstract data be utilized for  
30 comparing quality of care across countries and/or jurisdictions, or for monitoring system  
31 performance in an institution? Because data quality contributes to the magnitude of PSIs, data  
32 validity has to be similar across comparison groups (such as countries, regions or jurisdictions)  
33 and over time. Thus, PSIs should not be compared across jurisdictions without validation  
34 because adjustment for data validity is necessary. Our findings suggest that PSIs could be used to  
35 screen potential cases with adverse events using administration data. Confirming the presence of  
36 these events needs additional clinical information such as chart reviews. If PSIs are used for  
37 comparison, validity of data has to be adjusted and considered for in the analysis.  
38  
39  
40  
41  
42  
43  
44  
45  
46  
47  
48  
49

50 While PSIs are used for monitoring quality of care improvement over time, the  
51 assumption of temporal consistency of data validity has to be met. Unfortunately, we did not  
52 evaluate PSI validity over time. Quan et al.(21) evaluated the impact of ICD-10 implementation  
53  
54  
55  
56  
57

1  
2  
3 on data quality through chart review of 32 conditions. Canadian ICD-10 data had significantly  
4 higher sensitivity for one condition and lower sensitivity for seven conditions relative to ICD-9-  
5 CM data. The two databases had similar sensitivity values for the remaining 24 conditions.  
6  
7 Walker(22) et al. compared coding practice between ICD-9-CM and ICD-10 and reported that  
8 the number of diagnoses coded decreased in four Canadian provinces and remained similar in  
9 other five provinces after implementation of ICD-10. Januel JM(23) et al. reported that of 36  
10 conditions assessed in Switzerland, Kappa values for ICD-10 and chart data increased for 29  
11 conditions and decreased for seven conditions compared with ICD-9-CM and chart data.  
12  
13  
14  
15  
16  
17  
18  
19  
20  
21

22 Our study has limitations. First, of 20 AHRQ PSIs, we intentionally evaluated five  
23 conditions that might have a high validity. Remaining PSIs should be evaluated in future studies.  
24  
25 Second, we used chart data as the reference standard; conditions not documented in chart were  
26 missing. Prospective data collection through clinical examination on these events should be  
27 conducted to establish near gold standard. Third, this study was conducted in one urban area; the  
28 validity of PSIs might vary by institutions or regions. Fourth, we evaluated the validity using  
29 PPV alone. Sensitivity, specificity and NPV should be assessed for all of the PSIs. The  
30 ascertainment of the sensitivity requires a large sample size and involves expensive and time  
31 consuming resources due to low prevalence rate of PSIs. Fifth, the sample sizes for certain PSIs  
32 are small and 95% confidence interval is relatively wide.  
33  
34  
35  
36  
37  
38  
39  
40  
41  
42  
43  
44  
45

46 In conclusion, our study supports that PSIs could be used for case-findings in the ICD-10  
47 hospital discharge abstract data. Even PSIs with low PPVs could be used to identify potential  
48 cases from large volume of admissions for verification through chart review. In contrast, their  
49 sensitivity has not been well-characterized because of the inherent challenges of reviewing huge  
50 numbers of charts for properly testing sensitivity. Therefore, users of PSIs should be cautious if  
51  
52  
53  
54  
55  
56  
57  
58  
59  
60



1  
2  
3  
4  
5  
6  
7  
8  
9  
10  
11  
12  
13  
14  
15  
16  
17  
18  
19  
20  
21  
22  
23  
24  
25  
26  
27  
28  
29  
30  
31  
32  
33  
34  
35  
36  
37  
38  
39  
40  
41  
42  
43  
44  
45  
46  
47  
48  
49  
50  
51  
52  
53  
54  
55  
56  
57  
58  
59  
60

using these for 'quality of care reporting' presenting rate of PSIs because under-coded data would generate falsely low PSI rates.

For peer review only

Table 1. Characteristics of patients by AHRQ patient safety indicator (PSI)

|                     | PSI 5<br>Foreign body<br>left during<br>procedure<br>N= 45 | PSI 7<br>Selected<br>infections<br>due to<br>medical care<br>N=85 | PSI12<br>Postoperative<br>pulmonary<br>embolism or<br>deep vein<br>thrombosis<br>N=43 surgery<br>patients | PSI13<br>Postoperative<br>sepsis<br>N=41 surgery<br>patients | PSI15<br>Accidental<br>puncture or<br>laceration<br>N=120 |
|---------------------|------------------------------------------------------------|-------------------------------------------------------------------|-----------------------------------------------------------------------------------------------------------|--------------------------------------------------------------|-----------------------------------------------------------|
| Age Mean<br>(Range) | 58.0<br>(21.6 – 93.5)                                      | 61.7<br>(18.5 – 90.0)                                             | 67.2<br>(31.0 – 94.0)                                                                                     | 63.9<br>(19.9 – 83.5)                                        | 57.9<br>(19.3 – 96.5)                                     |
| Sex (male)          | 24<br>(53.3%)                                              | 47<br>(55.3%)                                                     | 23<br>(53.5%)                                                                                             | 15<br>(36.6%)                                                | 44<br>(36.7%)                                             |
| Length of<br>stay   | 14.7<br>(1 – 195)                                          | 32.7<br>(2 – 184.0)                                               | 41.3<br>(2 - 274)                                                                                         | 43.9<br>(1 – 238)                                            | 16.2<br>(1. – 181)                                        |

Table 2. Positive predictive value and 95% confidence interval (95% CI) for AHRQ patient safety indicators (PSI) recorded in ICD-10 hospital discharge abstract administrative data comparing chart data

| Patient Safety Indicator                                                                | Including PSIs present on admission<br>% (n/N, 95% CI) | Excluding PSIs present on admission<br>% (n/N, 95% CI) |
|-----------------------------------------------------------------------------------------|--------------------------------------------------------|--------------------------------------------------------|
| PSI 5 Foreign body left during procedure                                                | 35.6% (16/45)<br>(21.9% - 51.2%)                       | 62.5% (10/16)<br>(35.4% - 84.8%)                       |
| PSI 7 Selected infections due to medical care                                           | 70.6% (60/85)<br>(59.7% - 80.0%)                       | 79.1% (53/67)<br>(67.4% - 88.1%)                       |
| PSI12 Postoperative pulmonary embolism or deep vein thrombosis among surgery patients   | 79.0% (34/43)<br>(64.0% - 90.0%)                       | 89.5% (17/19)<br>(66.9% - 98.7)                        |
| PSI13 Postoperative sepsis among surgery patients                                       | 9.8% (4/41)<br>(2.7% - 23.1%)                          | 12.5% (2/16)<br>(1.6% - 38.4%)                         |
| PSI15 Accidental puncture or laceration                                                 | 90.8% (109/120)<br>(84.2% - 95.3%)                     | 86.4% (51/59)<br>(75.0% - 94.0%)                       |
| When surgical status was ignored                                                        |                                                        |                                                        |
| PSI12 Pulmonary embolism or deep vein thrombosis among surgery and non-surgery patients | 25.2% (31/123)<br>(17.8% - 33.8%)                      | 27.0% (10/37)<br>(13.8% - 44.1%)                       |
| PSI13 Postoperative sepsis among surgery or non-surgery patients                        | 27.4% (32/117)<br>(19.5% - 36.4%)                      | 47.1% (16/34)<br>(29.8% - 64.9%)                       |

Table 3. Reasons for false positives of AHRQ patient safety indicators (PSI) in ICD-10 hospital discharge abstract administrative data when the indicator of presence on admission was ignored.

| PSI 5                                             | PSI 7                                        | PSI 12                                                   | PSI 13                               | PSI 15                                  |
|---------------------------------------------------|----------------------------------------------|----------------------------------------------------------|--------------------------------------|-----------------------------------------|
| Foreign body left during procedure                | Selected infections due to medical care      | Postoperative pulmonary embolism or deep vein thrombosis | Post operative sepsis                | Accidental puncture or laceration       |
| N=29                                              | N=25                                         | N=9                                                      | N=37                                 | N=11                                    |
| 18- present on admission                          | 7- present on admission                      | 6- present on admission                                  | 15- present on admission             | 4 – present on admission                |
| 8– no foreign body                                | 11 – unrelated to medical care               | 2 – had DVT/PE in past                                   | 12 – urgent surgeries, having sepsis | 7 –no accidental puncture or laceration |
| 2 – for treatment purposes (e.g. packing, stitch) | 5 – IV site bruised or injured, no infection | 1 – no DVT/PE                                            | 6 – urgent surgeries, no sepsis      |                                         |
| 1 – patient pulled and broke catheter             | 2 – conflicting documentation                |                                                          | 2 – no sepsis                        |                                         |
|                                                   |                                              |                                                          | 2 – no surgery, sepsis               |                                         |

## ACKNOWLEDGEMENTS

Dr Quan and Ghali are supported by Alberta Innovates- Health Solutions salary awards. Dr Ghali is supported by Government of Canada Chairs. IMECCHI investigators are listed at [www.IMECCHI.org](http://www.IMECCHI.org)

## COMPETING INTERESTS

None to declare.

## FUNDING

This work was supported by Canadian Institutes of Health Research grant number 172490.

## CONTRIBUTOR STATEMENT

Hude Quan: Conception and design, acquisition of data, analysis, interpretation of data, and final approval of the version to be published.

Cathy Eastwood: Acquisition of data, interpretation of data, critical revision and final approval of the version to be published.

Ceara Tess Cunningham: Acquisition of data, interpretation of data, critical revision and final approval of the version to be published.

Mingfu Liu: Acquisition of data, analysis, interpretation of data, critical revision and final approval of the version to be published.

1  
2  
3 Ward Flemons: Conception and design, interpretation of data, critical revision and final approval  
4  
5 of the version to be published.  
6  
7

8  
9 Carolyn De Coster: Conception and design, interpretation of data, critical revision and final  
10  
11 approval of the version to be published.  
12  
13

14  
15 William A Ghali: Conception and design, interpretation of data, critical revision and final  
16  
17 approval of the version to be published.  
18  
19

20  
21 **Data Sharing:** Extra data is available by emailing [hquan@ucalgary.ca](mailto:hquan@ucalgary.ca).  
22  
23  
24  
25  
26  
27  
28  
29  
30  
31  
32  
33  
34  
35  
36  
37  
38  
39  
40  
41  
42  
43  
44  
45  
46  
47  
48  
49  
50  
51  
52  
53  
54  
55  
56  
57  
58  
59  
60

## References

- (1) Baker GR, Norton PG. Adverse events and patient safety in Canadian health care. *CMAJ* 2004 Feb 3;170(3):353-4.
- (2) Zhan C, Kelley E, Yang HP et al. Assessing patient safety in the United States: challenges and opportunities. *Med Care* 2005 Mar;43(3 Suppl):42-7.
- (3) Zhan C, Miller MR. Administrative data based patient safety research: a critical review. *Qual Saf Health Care* 2003 Dec;12 Suppl 2:58-63.
- (4) Agency for Healthcare Research and Quality. Patient Safety Indicators: Technical Specifications (version 4.2). <http://www.qualityindicators.ahrq.gov>
- (5) Drosler SE, Klazinga NS, Romano PS et al. Application of patient safety indicators internationally: a pilot study among seven countries. *Int J Qual Health Care* 2009 Aug;21(4):272-8.
- (6) Drosler SE, Romano PS, Tancredi DJ, Klazinga NS. International comparability of patient safety indicators in 15 OECD member countries: a methodological approach of adjustment by secondary diagnoses. *Health Serv Res* 2012 Feb;47(1 Pt 1):275-92.
- (7) Jette N, Quan H, Hemmelgarn B et al. The Development, evolution, and modifications of ICD-10: Challenges to the international comparability of morbidity data. *Med Care* 2010 Dec;48(12):1105-10.
- (8) Canadian Institute for Health Information. Canadian Coding Standards for ICD-10-CA and CCI. [http://secure.cihi.ca/cihiweb/dispPage.jsp?cw\\_page=RC\\_382\\_E](http://secure.cihi.ca/cihiweb/dispPage.jsp?cw_page=RC_382_E)
- (9) Quan H, Drösler S, Sundararajan V et al. Adaptation of AHRQ Patient Safety Indicators for Use in ICD-10 Administrative Data by an International Consortium. *Advances in Patient Safety: New Directions and Alternative Approaches* 2013 Jan 3.
- (10) Zhou X, Obuchowski N, McClish D. *Statistical methods in diagnostic medicine*. 2 ed. New Jersey: John Wiley & Sons; 2011.
- (11) AHRQ. AHRQ quality indicators validation pilot. <http://qualityindicators.ahrq.gov/validationpilot.htm>
- (12) White RH, Sadeghi B, Tancredi DJ et al. How valid is the ICD-9-CM based AHRQ patient safety indicator for postoperative venous thromboembolism? *Med Care* 2009 Dec;47(12):1237-43.
- (13) Henderson KE, Recktenwald A, Reichley RM et al. Clinical validation of the AHRQ postoperative venous thromboembolism patient safety indicator. *Jt Comm J Qual Patient Saf* 2009 Jul;35(7):370-6.

- 1  
2  
3 (14) Zhan C, Battles J, Chiang YP, Hunt D. The validity of ICD-9-CM codes in identifying  
4 postoperative deep vein thrombosis and pulmonary embolism. *Jt Comm J Qual Patient*  
5 *Saf* 2007 Jun;33(6):326-31.  
6  
7
- 8 (15) Romano PS, Mull HJ, Rivard PE et al. Validity of selected AHRQ patient safety  
9 indicators based on VA National Surgical Quality Improvement Program data. *Health*  
10 *Serv Res* 2009 Feb;44(1):182-204.  
11
- 12 (16) Kaafarani HM, Borzecki AM, Itani KM et al. Validity of selected patient safety  
13 indicators: opportunities and concerns. *J Am Coll Surg* 2011 Jun;212(6):924-34.  
14
- 15 (17) Utter GH, Zrelak PA, Baron R et al. Positive predictive value of the AHRQ accidental  
16 puncture or laceration patient safety indicator. *Ann Surg* 2009 Dec;250(6):1041-5.  
17  
18
- 19 (18) Koch CG, Li L, Hixson E, Tang A, Phillips S, Henderson JM. What are the real rates of  
20 postoperative complications: elucidating inconsistencies between administrative and  
21 clinical data sources. *J Am Coll Surg* 2012 May;214(5):798-805.  
22  
23
- 24 (19) Hennessy DA, Quan H, Faris P, Beck CA. Do coder characteristics influence validity of  
25 ICD-10 hospital discharge data? *BMC Health Serv Res* 2010;10:99.  
26
- 27 (20) So L, Beck CA, Brien S et al. Chart documentation quality and its relationship to the  
28 validity of administrative data discharge records. *Health Informatics J* 2010;16(2):101-  
29 13.  
30  
31
- 32 (21) Quan H, Li B, Saunders LD et al. Assessing validity of ICD-9-CM and ICD-10  
33 administrative data in recording clinical conditions in a unique dually coded database.  
34 *Health Serv Res* 2008 Aug;43(4):1424-41.  
35
- 36 (22) Walker RL, Hennessy DA, Johansen H, Sambell C, Lix L, Quan H. Implementation of  
37 ICD-10 in Canada: how has it impacted coded hospital discharge data? *BMC Health Serv*  
38 *Res* 2012;12:149.  
39
- 40 (23) Januel JM, Luthi JC, Quan H et al. Improved accuracy of co-morbidity coding over time  
41 after the introduction of ICD-10 administrative data. *BMC Health Serv Res* 2011;11:194.  
42  
43  
44  
45  
46  
47  
48  
49  
50  
51  
52  
53  
54  
55  
56  
57  
58  
59  
60
